1

2       **Neural code uses self-information principle to organize**  
3       **the brain's universal cell-assembly coding**

4

5       Meng Li<sup>1</sup>, Kun Xie<sup>1,2</sup>, Hui Kuang<sup>1</sup>, Jun Liu<sup>1</sup>, Deheng Wang<sup>1,2</sup>, Grace E. Fox<sup>1</sup>, Zhifeng  
6       Shi<sup>3</sup>, Liang Chen<sup>3</sup>, Fang Zhao<sup>1\*</sup>, Ying Mao<sup>3\*</sup>, & Joe Z. Tsien<sup>1\*</sup>

7       <sup>1</sup>Brain and Behavior Discovery Institute and Department of Neurology, Medical College  
8       of Georgia at Augusta University, Augusta, GA 30912, USA

9       <sup>2</sup>The Brain Decoding Center, Banna Biomedical Research Institute, Yunnan Province  
10       Academy of Science and Technology, Xi-Shuang-Ban-Na Prefecture, Yunnan, China

11       <sup>3</sup>Department of Neuropathology, Huashan Hospital, Fudan University, Shanghai 200040,  
12       China

13       \*Correspondence should be addressed to Fang Zhao ([fzhao@augusta.edu](mailto:fzhao@augusta.edu)) and Joe Z.  
14       Tsien ([itsien@augusta.edu](mailto:itsien@augusta.edu)).

15

16

17

18       **Running title:** Real-time neural coding via self-information principle

19       **Keywords:** neural coding, cell assembly, neuronal variability, neuronal variability-  
20       surprisal.

21

22

## 23 **Abstract**

24           The brain generates cognition and behavior through firing changes of its neurons,  
25 yet, with enormous firing variability, the organizing principle underlying real-time neural  
26 code remains unclear. Here, we test the Neural Self-Information Theory that neural code  
27 is constructed via the self-information principle under which each inter-spike-interval (ISI)  
28 is inherently self-tagged with discrete information based on its relation to ISI variability-  
29 probability distribution - higher-probability ISIs, which reflect the balanced excitation-  
30 inhibition ground state, convey minimal information, whereas lower-probability ISIs, which  
31 signify statistical surprisals, carry more information. Moreover, temporally coordinated ISI  
32 surprisals across neural cliques intrinsically give rise to real-time cell-assembly neural  
33 code. As a result, this self-information-based neural coding is uniquely intrinsic to the  
34 neurons themselves, with no need for outside observers to set any reference point to  
35 manually mark external or internal inputs. Applying this neural self-information concept,  
36 we devised an unbiased general decoding strategy and successfully uncovered 15 distinct  
37 cell-assembly patterns from multiple cortical and hippocampal circuits associated with  
38 different sleep cycles, earthquake, elevator-drop, foot-shock experiences, navigation or  
39 various actions in five-choice visual-discrimination operant-conditioning tasks. Detailed  
40 analyses of all 15 cell assemblies revealed that ~20% of the skewed ISI distribution tails  
41 were responsible for the emergence of robust cell-assembly codes, conforming to the  
42 Pareto Principle. These findings support the notion that neural coding is organized via the  
43 self-information principle to generate real-time information across brain regions, cognitive  
44 modalities, and behaviors.

## 45 **Introduction**

46           A central theme in brain research is to understand how perception, memories, and  
47 actions are dynamically represented in real time by firing patterns of neurons. Over the  
48 past several decades, substantial efforts have been directed at measuring how changes  
49 in firing rates encode stimulus identity (referred to as the rate code), and/or how the exact  
50 timing of spikes from a neuron or the relative timing of spikes across multiple neurons  
51 convey information about the stimuli (generally referred to as the temporal code).  
52 However, one of the major stumbling blocks to cracking the *real-time* neural code is the  
53 neuronal variability; neurons in the brain discharge their spikes with tremendous variability  
54 across trials in response to the identical stimuli (1-5). From a signal-processing  
55 perspective, such a variability would represent noise, which has been shown to undermine  
56 reliable decoding of stimulus identities in real time (2, 3, 5-10). On the other hand, neurons  
57 in slice preparations are known to be capable of generating precisely-timed spikes in  
58 response to fluctuating currents injected at the soma (11, 12). Thus, firing variability is not  
59 due to imprecision in spike generation at the soma *per se*. Moreover, studies in the  
60 primary visual cortex or motor cortex showed that noise variability exhibited a certain level  
61 of correlation, which has been postulated to reflect varying attentional states or other  
62 modulatory signals such as intent (13-22). Despite the potential benefits or deeper  
63 implications that neuronal variability may bring, in practice, researchers typically treated  
64 firing variability as noise and dislodged it by applying over-trial data-averaging methods,  
65 e.g., peri-time stimulus histogram (PTSH) to better assess tuning properties of the  
66 recorded neurons. Obviously, such averaging procedure inherently assumed that any  
67 information possibly encoded in the temporal structure of the spike train can be (largely)  
68 ignored. Yet, it is widely acknowledged that this over-trial averaging approach is unlikely

69 the real-time coding strategy that the brain uses to signal perception, memories, and  
70 actions on a moment-to-moment basis.

71 At a more fundamental level, firing variability - typically measured as variations in  
72 inter-spike-intervals (ISI) - is not just limited to trial-to-trial responses upon external  
73 stimulation, rather it represents a general property that is reflected continuously  
74 throughout all stages of mental processes and behaviors, including the “control” resting  
75 periods and sleep. In fact, spontaneous firing changes during those natural states or  
76 periods can be as large, if not larger, as those upon experimental stimulation (4, 8, 23-25).  
77 Such an ongoing spontaneous fluctuation in firing would seem to be profoundly  
78 paradoxical for achieving the robustness of neural coding on the moment-to-moment time  
79 basis: Why would the brain utilize this seemingly noisy and even counterproductive mode  
80 to convey information and generate cognitions in real time? Is there a deeper meaning  
81 for what neuronal variability may really stand? In other words, how is real-time neural  
82 code constructed in the face of such notorious firing variability? Can such a neural code  
83 be intrinsic to neurons themselves rather than being decipherable merely to outside  
84 observers?

85 In an attempt to explore these conceptual issues, we recently postulated the  
86 *Neural Self-Information Theory* that neural coding conforms to the self-information  
87 principle, which utilizes inter-spike-interval (ISI) variability and its variability history to  
88 generate the *self-information code* (26). Specifically, neuronal variability operates as the  
89 self-information generator and messenger; higher-probability ISIs, which reflect the  
90 balanced excitation-inhibition ground-state, convey less information, whereas lower-  
91 probability ISIs, which signify statistical surprisals, convey more information. At the  
92 physiological level, the rare-occurrence of ISI corresponds to unusually brief or prolonged  
93 neuronal silent periods, such as bursting patterns or strong inhibition, respectively. More



94 importantly, the *Neural Self-Information Theory* further posits that at the population level,  
95 temporally coordinated ISI surprisals across neural clique members can seamlessly give  
96 rise to robust real-time cell-assembly codes (25, 26).

97         Guided by the *Neural Self-Information Theory*, we set out to test whether we can  
98 identify real-time cell assembly patterns from a variety of brain regions and across different  
99 mental states or tasks. Cell assembly is a group of co-activated neurons that has long  
100 been hypothesized by Hebb (1949) (27) as the population-level computational motif to  
101 represent real-time perception and thoughts (11, 28-32). We applied the *Neural Self-*  
102 *Information Theory* to decode activity patterns in the prelimbic cortex, anterior cingulate  
103 cortex and hippocampal CA1 of freely-behaving mice. At least fifteen different cortical and  
104 hippocampal cell assemblies were identified in an unbiased manner, spanning from *those*  
105 *encoding categorical variables* such as earthquake, foot-shock, elevator-drop, or various  
106 operant actions during a five-choice visual-discrimination task, as well as those cell  
107 assemblies *encoding continuous variables*, such as spatial navigation or different stages  
108 of sleep cycles. Our analyses further revealed the conserved critical boundaries from  
109 which low-probability ISIs emerge as statistically significant self-information packets for  
110 the construction of robust cell-assembly neural code in real time.

## 111 **Results**

### 112 **Neuronal variability is large and remains similar across the different brain regions**

113           The *Neural Self-Information Theory* posits that neuronal variability acts as a self-  
114 information generator which should remain robust across various brain regions (26). On  
115 the other hand, if neuronal variability reflects *system noise*, one might expect that  
116 variability would grow larger as information is transmitted from low subcortical structures  
117 to high-cognition cortices. To differentiate these two scenarios, we used 128-channel  
118 tetrode arrays to record large numbers of neurons from six cortical and sub-cortical  
119 regions - namely, the basolateral amygdala (BLA), hippocampal CA1, dorsal striatum  
120 (STR), retrosplenial Cortex (RSC), prelimbic cortex (PRL) and anterior cingulate cortex  
121 (ACC), respectively - in freely-behaving mice. To facilitate direct comparison, we focused  
122 on putatively classified principal projection cells by excluding fast-spiking putative  
123 interneurons ([Figure S1](#)) and analyzed their variability distributions.

124           Neuronal variability is typically measured from ISIs distribution ([Figure 1A](#)) from  
125 which three well-defined statistics can be used to describe quantitatively neuronal  
126 variability of a given neuron - namely, a coefficient of variation (CV), skewness, and  
127 kurtosis (see Materials and Methods). In probability theory and statistics, CV is a  
128 standardized measure of dispersion of a probability distribution, and skewness is a  
129 measure of the asymmetry of a probability distribution, whereas kurtosis is a measure of  
130 the "tailedness" of a probability distribution. For comparison purposes, *normal distribution*  
131 (indicating stochastic process) has  $CV = \text{mean}/\text{std}$ ,  $\text{Skewness} = 0$  and  $\text{Kurtosis} = 0$ , while  
132 *exponential distribution* (indicating Poisson process) has  $CV = 1$ ,  $\text{Skewness} = 2$  and  
133  $\text{Kurtosis} = 6$ . The more skewed/long-tail a distribution exhibits, the larger CV, skewness  
134 and kurtosis it has.

135 Our analyses showed that principal projection cells in these six different mouse  
136 brain regions exhibited similar neuronal variability distributions (Figure 1B, see also Figure  
137 S2A-D). Their CVs were all in a range of 0-4 (Figure S2B, BLA =  $1.59 \pm 0.02$ , CA1 =  $1.64$   
138  $\pm 0.02$ , STR =  $1.71 \pm 0.03$ , RSC =  $1.23 \pm 0.01$ , PrL =  $1.41 \pm 0.04$ , and ACC =  $1.54 \pm 0.03$ ).  
139 Skewness was in 0-10 range (Figure S2C, BLA =  $3.27 \pm 0.07$ , CA1 =  $3.77 \pm 0.07$ , STR =  
140  $3.74 \pm 0.10$ , RSC =  $3.00 \pm 0.04$ , PrL =  $3.47 \pm 0.14$ , and ACC =  $3.78 \pm 0.11$ ), whereas  
141 Kurtosis had a range of 0-150 (Figure S2D, BLA =  $20.77 \pm 0.94$ , CA1 =  $29.45 \pm 1.09$ , STR  
142 =  $27.36 \pm 1.47$ , RSC =  $19.28 \pm 0.66$ , PrL =  $24.78 \pm 2.04$ , and ACC =  $28.98 \pm 1.74$ ).  
143 Therefore, these results show that neuronal variability is large and remains at a similar  
144 level across multiple brain regions and principal cell types (i.e. excitatory pyramidal cells  
145 in the CA1 vs. putative medium spiny neurons in the striatum). It did not grow larger from  
146 the amygdala and CA1 to the RSC and prefrontal cortices as the *system-noise model*  
147 would have predicted.

#### 148 **Firing variability was reduced if cognitive coding was shut down by anesthesia**

149 To further test the idea that neuronal variability serves as the self-information  
150 generator and messenger, one would expect that variability will diminish under the  
151 condition when both external and internal cognitive computation is artificially shut down  
152 (i.e. upon anesthesia). Ketamine/domitor administration is a widely used protocol to  
153 induced anesthesia. Accordingly, we recorded activity patterns of large numbers of cells  
154 from the BLA and CA1, respectively, in the awake state as well as under ketamine/domitor-  
155 induced anesthesia. Using the same set of putative pyramidal neurons, we asked how  
156 the skewed distributions of ISI differ during anesthesia vs. those during awake period.  
157 Indeed, in both the BLA and CA1, putative pyramidal cells drastically decreased their  
158 neuronal variability upon anesthesia (Figure 1C; also see Figure S2E). The skewed/long-  
159 tailed distributions of ISI in the CA1 was significantly reduced (CV:  $1.71 \pm 0.08$  in awake

160 vs.  $1.36 \pm 0.21$  under anesthesia,  $P=0.00024$ ; skewness:  $4.46 \pm 0.25$  in awake vs.  $2.04 \pm$   
161  $0.38$  under anesthesia,  $P=4.1e-16$ ; Kurtosis:  $39.53 \pm 4.17$  in awake vs.  $8.68 \pm 2.85$  under  
162 anesthesia,  $P=3.3e-11$ ) (Figure S2E, top row). Similarly, BLA pyramidal cells also greatly  
163 reduced their neuronal variability (CV:  $1.83 \pm 0.05$  in awake vs  $1.28 \pm 0.20$  under  
164 anesthesia,  $P=1.1e-16$ ; skewness:  $4.90 \pm 0.19$  in awake vs.  $2.46 \pm 0.50$  under anesthesia,  
165  $P=5.8e-24$ ; kurtosis:  $45.29 \pm 3.54$  in awake vs.  $11.87 \pm 3.92$  under anesthesia,  $P=4.0e-17$ )  
166 (Figure S2E, bottom row). The reduction in firing variability was evident from ketamine-  
167 induced rhythmic spike-discharge patterns (Figures S2F and S2G). These  
168 pharmacological intervention experiments demonstrate that the shutting down of external  
169 and internal cognitive coding processes indeed diminished neuronal variability.

#### 170 **Self-Information theory-based decoding strategy to uncover cell assemblies**

171 The key feature of the *Neural Self-Information Theory* is that any given ISI is  
172 inherently self-tagged with a discrete amount of information based on its ISI (the silence  
173 time duration) in a relationship with the ISI variability-probability distribution (variation  
174 history of silence time durations). Specifically, the amount of self-information (“*SI*”)  
175 contained in each ISI can be quantitatively obtained based on the ISI variability-distribution  
176 probability [ $SI = -\log(p)$ , where  $p$  is the probability] (26). The smaller the probabilities in  
177 ISIs, the larger the variability surprisals, which convey more information (in statistical terms,  
178 those events with low-occurrence probability are called *surprisals*). At the physiological  
179 level, these self-information ISI surprisals can be either positive (when a neuron’s ISI  
180 becomes much shorter than is typical, reflecting strong excitation) or negative (when ISI  
181 becomes much longer than is typical, reflecting strong inhibition). Subsequently, these  
182 dynamic, transient surprisal silence-duration (ISI) patterns would act as the critical real-  
183 time information packets at a single neuron level. More importantly, when these surprisal

184 ISIs are generated across a cell population in a temporally coordinated manner, their  
185 collective patterns would intrinsically give rise to robust real-time cell-assembly code.

186 To experimentally test the validity of this hypothesis, we set out to devise a general  
187 decoding strategy based on the neural self-information concept to uncover cell assemblies  
188 from spike-train datasets recorded from different brain regions, mental states, and  
189 behavioral tasks. This Variability-based Cell-Assembly Decoding (VCAD) method  
190 consisted of the following three major steps ([Figure 2](#)):

191 **1) To convert ISI variations into real-time variability surprisals.** In practice,  
192 measurement of ISI probability distribution can be determined numerically. In contrast to  
193 the prevalent notion that spike variability is a Poisson distribution, emerging studies have  
194 suggested that ISI variability in many neural circuits conform to the gamma distribution  
195 (33). Thus, we first fitted single neuron's ISIs with a gamma distribution model which can  
196 assign each neuron's ISI with a probability. Subsequently, a spike train emitted by a  
197 neuron can be transformed into surprisal-based ternary code (positive surprisal as 1,  
198 ground state as 0, negative surprisal as -1) to describe the dynamic evolution in self-  
199 information states ([Figure 2A](#)).

200 **2) To uncover joint ISI surprisal patterns in space and time.** This step  
201 searches for joint variability surprisals in both space (across simultaneously-recorded cells)  
202 and time (moment-to-moment dynamics). Blind source separation (BSS) methods, such  
203 as independent component analysis (ICA), can be used to efficiently identify a set of  
204 independent information sources from simultaneously observed signals as structured  
205 patterns or relationships. Although the nature of the demixing matrix's dimension  $p$  meant  
206 that  $p$  information sources can be theoretically decoded from population activity, we  
207 reasoned that optimal neural coding should also be energy efficient via utilizing the least

208 amount of variability surprisals together with the minimal numbers of such information-  
209 coding cells. As such, we used the minimal CV values in each dataset to unbiasedly  
210 assess the optimal numbers of independent information sources (distinct cell assemblies)  
211 (Figure 2B; also see Figure S3A, Materials and Methods).

212 **3) To identify corresponding cell assemblies.** Each independent signal source  
213 decoded by BSS corresponds to a distinct real-time activation pattern given by a cell  
214 assembly. To discover the functional meaning of each cell assembly pattern, one can  
215 compare the time points marked by each real-time activation with various other  
216 experimental parameters recorded during experiments, such as local field potential (LFP),  
217 the time points of stimulus presentations, or video tapes of an animal's behavioral state,  
218 specific actions and performance, or spatial locations, etc. The top-ranking membership  
219 with the highest contribution weights in the cell assembly can be directly identified from  
220 demixing matrix  $\mathbf{W}$  (Figure 2C; also see Figure S3B). Moreover, their contributions to a  
221 given cell-assembly pattern can be quantitatively defined by shuffling techniques (i.e. by  
222 shuffling or artificially changing spike patterns to alter surprisal states). This step allowed  
223 us to assess quantitative membership information that other dimensionality-reduction-  
224 based pattern-classification methods (i.e. principal component analysis or multiple  
225 discriminant analysis) could not provide.

226 In the study of neural coding, cognitive and physiological inputs associated with  
227 external and internal states typically fall into two major categories - namely, continuous  
228 variables (i.e. arm movement, navigation, sleep oscillations, etc.) and categorical variables  
229 (i.e. distinct events, stimuli, discrimination tasks, etc.). If neuronal variability surprisals act  
230 as the universal coding vehicle to provide discrete quanta of information, one would predict  
231 that this VCAD method should be able to uncover various cell assemblies related to such  
232 a wide range of dynamic operations across different brain regions.

## 233 **Identification of cortical cell assemblies encoding distinct emotional experiences**

234 We asked whether a variability-based self-information process underlies real-time  
235 coding of discrete categorical variables, namely, fearful experiences such as earthquake,  
236 foot-shock and a sudden elevator drop (as one experienced during the Tower-of-Terror  
237 ride in Disney theme park). The anterior cingulate cortex (ACC) is part of the prefrontal  
238 cortex known to process emotions and fear memories (34-36). To examine how the ACC  
239 discriminates and categorizes distinct fearful experiences at the population level, we  
240 employed 128-channel tetrodes to monitor spike activity of large numbers of ACC while  
241 the recording mice encountered earthquake, foot-shock and sudden elevator drop which  
242 are known to produce fear responses (37). By scanning through the real-time spike  
243 dataset that contained 146 well-isolated, simultaneously-recorded ACC units, our VCAD  
244 method automatically uncovered three distinct ensemble patterns. We found that these  
245 patterns corresponded to the occurrences of one of three fearful stimulations ([Figure 3A](#)).  
246 Specifically, ACC assembly-1 activations were time-locked to the occurrences of six  
247 earthquake events; ACC assembly-2 was temporally corresponding to six foot-shock  
248 events; and ACC assembly-3 was matched to free-fall events. Their unique ensemble  
249 patterns were further verified by shuffling their top 20% large-weight neurons' firing  
250 patterns with the Gaussian signal using the same mean firing rate and standard deviation  
251 ([Figure S4A](#)). This shuffling procedure showed that the ensemble representation of a  
252 given event (e.g. free-fall) gradually became weaker as more top-contribution neurons  
253 were shuffled, while leaving the other two ensemble patterns (e.g. representing the  
254 earthquake or foot-shock) unchanged. Peri-event spike raster and histogram plot  
255 analyses ([Figure S4B](#)) revealed that while the majority of member cells exhibited event-  
256 specific responses (i.e., earthquake-specific, free-fall specific, or foot-shock specific ACC

257 cells), some of the top cell-assembly members participated in two cell assemblies or even  
258 all of the three assemblies (Figures 3B-D).

### 259 **Identification of cell assemblies related to sleep oscillations**

260           Next, we investigated whether the self-information coding concept can be used to  
261 identify cell-assembly patterns related to internally-driven, continuous variable processes.  
262 Sleep is associated with and defined by changes in EEG or local field potential oscillations  
263 (38). It has important functions for memory consolidation and behaviors (38-41) or fear-  
264 memory consolidation (42-44), relatively less is known about the functional classification  
265 and organization of CA1 cell assemblies during natural sleep oscillation cycles. Thus, we  
266 asked whether the VCAD method can be used to identify cell assemblies in the CA1  
267 related to various cycles of sleep. We scanned a 20-minute spike dataset collected from  
268 the mouse hippocampal CA1 region during a sleep session and analyzed the ISI variability  
269 of 266 units recorded simultaneously using 128-channel tetrode arrays. Our VCAD  
270 analyses of spike dynamics unveiled a total of three major ensemble patterns over the  
271 time course of 20-minute sleep period (Figure 4A). To search for the relationships of these  
272 three assembly patterns and sleep oscillations, we aligned these CA1 temporal patterns  
273 with the time-course plot of the simultaneously recorded LFP oscillations. Interestingly, we  
274 found that the temporal emergence of Cell Assembly-1 patterns was tightly matched to  
275 the occurrences of theta oscillation (Figure 4B), whereas Assembly-2 patterns were time-  
276 locked to ripple oscillation (Figure 4C). Furthermore, we found that the activation of  
277 Assembly-3 temporally corresponded to the DOWN-state of sleep cycles (Figure 4D) - that  
278 is, this ensemble pattern was consistently time-locked with the troughs of various LFP  
279 frequency bands.



280 By further taking advantage of the VCAD method in providing the ranking of cell-  
281 assembly members, we found that the top 20% ranking units (with largest weights in  
282 demixing matrix  $\mathbf{W}$ ) in CA1 Assembly-1 cells with consisted of mostly putative  
283 interneurons (Figure 4E, n=53 cells). The shuffling technique (replacing their firing pattern  
284 with Gaussian signal with the same mean firing rate and standard deviation) revealed that  
285 the Assembly-1 pattern was abolished as these top 20% contribution-cells' firing patterns  
286 were shuffled (Figure S5A). Interestingly, only about 15% of these Assembly-1 cells (eight  
287 cells, identified as putative O-LM cells or basket cells/bistratified cells based on the  
288 multiple criteria for interneuron sub-classification, see Figure S5B and S5C) exhibited a  
289 robust phase-locking relationship with theta oscillations (termed as Theta-coupled  
290 Assembly-1 cells) (Figure S5B and S5C), which is consistent with evidence from literature  
291 that CA1 interneurons exhibited theta-coupling (39, 40, 45-47). Surprisingly, many  
292 Assembly-1 cells (45 cells, ~85% in Assembly -1) were not phase-locked with theta phase,  
293 but rather exhibited a significant difference in averaged firing rates between theta epochs  
294 vs. non-theta epochs. One major group of the rate-altering cells, classified as putative  
295 Bursty cells (17 cells) (Figure S5D), dramatically increased their firings during theta cycles  
296 in comparison to non-theta epoch, whereas two putative pyramidal cells significantly  
297 decreased their firings during theta sleep cycles (Figure S5E).

298 Another surprising finding was that many theta-coupled CA1 cells from the  
299 simultaneously recorded dataset did not belong to Assembly-1. These non-member theta  
300 cells were intriguingly distinct from those Assembly-1 theta cells as confirmed by their  
301 significant differences in firing correlation (Figure S6A). This suggests that theta-coupling  
302 does not necessarily indicate the common membership. In fact, two distinct populations  
303 of theta interneurons exist in the CA1, with one subset uniquely engaged in sleep theta.  
304 Similarly, we noted that there were many rate-altering cells that did not belong to

305 Assembly-1. Their distinct memberships were further supported by a dramatic statistical  
306 difference in the correlation coefficient between rate-altering member cells and rate-  
307 altering non-member cells (Figure S6B).

308 We then analyzed the nature of CA1 Assembly-2 ensemble patterns which were  
309 tightly time-locked with ripple peaks (Figure 4C). In contrast to Assembly-1, the majority  
310 of the top Assembly-2 cells were mostly putative pyramidal cells (Figure 4F). It is  
311 worthwhile to note that many *non-member cells* also showed rate changes between ripple  
312 epochs vs. non-ripple periods. Yet, they were distinct from Assembly-2 cells as evidenced  
313 by the significant difference in their correlation (Figure S6C).

314 As to Assembly-3 cells (Figure 4D), we found that they also consisted of mostly  
315 interneurons (Figure 4G). But many of them were different from those interneurons listed  
316 in the Assembly-1 (Figure S7). It was repeatedly noticed that several cells (~15%) were  
317 cross-listed in multiple-sleep oscillatory patterns. The best example is that the same  
318 putative O-LM cells were repeatedly identified in all three sleep assemblies. Overall,  
319 these three distinct cell assemblies identified by the self-information coding scheme  
320 consistently showed significantly higher correlations among themselves, in comparison to  
321 across the populations (Figure S6D). The above results demonstrated that the unbiased  
322 VCAD method has enabled us to identify distinct cell assemblies that were time-locked to  
323 distinct sleep LFP oscillations.

### 324 **Unbiased identification of CA1 cell assemblies underlying place navigation and** 325 **start/finish experiences**

326 To further demonstrate the generality of the self-information coding concept, we  
327 asked whether the VCAD method can be used to identify and verify the most studied cell  
328 assembly patterns, namely, place cells in the hippocampus. CA1 place cells exhibit

329 sequential firing patterns indicating positional information (23, 28, 30, 31, 48-54). Similar  
330 to the huge variability of other neurons in the brain, place cells also exhibit trial-to-trial  
331 variability, which rendered real-time firing sequences unreliably (23, 24, 28, 30, 31).  
332 Traditionally, identification of place cells involved averaging spike counts over spatial tiles  
333 using x-y pixel coordinates. Because motion can greatly change firing rates of CA1 cells,  
334 in literature spike rasters below a certain running speed were typically removed during this  
335 data analysis step (a process critical to dislodge variability noise). We wondered whether  
336 the self-information concept could be used to identify hippocampal place cells without  
337 using such trial-averaging methods, but rather in an unbiased manner via simply scanning  
338 population spike rasters using the VCAD sliding-window method on a moment-to-moment  
339 fashion.

340 Therefore, we applied the self-information decoding method to 20-minute spike  
341 trains of 266 simultaneously recorded CA1 units from a mouse which was well trained to  
342 run back and forth on a one-meter linear track (without using trial-averaging spike counts  
343 over spatial pixels). Based on the minimum CV as the best relevant dimension, our VCAD  
344 method unbiasedly revealed two distinct CA1 cell ensemble patterns ([Figure 5A](#)). As we  
345 aligned these two cell-assembly patterns with a videotape that recorded the animal's  
346 navigational positions and behaviors on the linear track, we found that these two real-time  
347 ensemble patterns were matched nicely to the westbound and eastbound navigations,  
348 respectively ([Figure 5B](#)). Then, we examined top-ranking members from each cell  
349 assembly based on their matrix weights, and performed position-firing analysis of these  
350 cells. A closer examination of the top-weighted CA1 neurons listed in these two cell  
351 assemblies revealed that some of these cells exhibited classic single place field place  
352 ([Figure 5C](#)). Many of other cells also showed multiple place fields ([Figure 5D](#)). Among  
353 the list, we also noticed that some of the top-contributing CA1 cells did not exhibit discrete

354 place field(s), but rather had differential responses corresponding to directional routing as  
355 the mouse traveled westbound or eastbound (Figure 5E) - that is, some CA1 cells  
356 preferentially fired in one travel direction over the other.

357 Unexpectedly, from the list of the VCAD-identified cell assemblies, we also found  
358 that both the eastbound and westbound cell assemblies contained cells signaling  
359 start/finish transitions, that is, these cells specifically decreased their firing at the start of  
360 running and remained low-firing until the end of the navigation (Figure 5F). While we  
361 found two start/finish cells engaged in both the westbound and eastbound journals, most  
362 interestingly, several CA1 start/finish cells exhibited journal- or direction-specific firing  
363 decreases (Figure 5F Unit-101 in the left sub-plot vs. Unit-103 in the right sub-plot; also  
364 see Figure S8). Such route-specific start/finish responses strongly suggest that the  
365 information coded by these cells were not merely corresponding to changes in motion  
366 states such as speed acceleration/deceleration, but journey-specific episode(s). Therefore,  
367 the neural self-information coding concept has successfully allowed uncovering CA1 place  
368 cells and their other assembly members, such as start/finish cells, important to account  
369 for multiple aspects of navigation-related variables.

### 370 **Prefrontal cell assemblies encoding five-choice visual-discrimination operant-** 371 **conditioning tasks**

372 Finally, we applied the self-information decoding approach to uncover novel cell  
373 assemblies in the prefrontal cortex related to the five-choice visual discrimination operant  
374 conditioning task – one of the most classical behaviors requiring a set of visually- and  
375 spatially-guided procedural actions. In this task, mice learned to nose-poke in one of the  
376 five temporarily lit apertures within a short time window in order to receive a food reward  
377 delivered from the food magazine located on the opposite side of the chamber. The mice

378 were trained to reach an 80% success rate (see Materials and Methods). A successful  
379 trial typically included the 5-sec illumination of one of the five apertures (in a randomized  
380 fashion) to signal the beginning of the trial. During this time, the mouse needs to run from  
381 the food magazine area to the response aperture area and then nose-poked in the  
382 transiently lit aperture (correct responses), which resulted in a single food pellet dropped  
383 onto the food dish from the magazine. The mouse then runs back to the food magazine  
384 area to eat the pellet, which triggers the next trial. A single session typically consisted of  
385 50 trials or more during which mice performed this attentive choice-action task.

386 We used 128-channel tetrode arrays and recorded from the prelimbic cortex (PRL)  
387 while well-trained mice performed this operant conditioning task. A total of 100 PRL cells  
388 were identified as a well-isolated unit and used for present analysis (those units did not  
389 meet the criterion were excluded). We then scanned the spike dataset consisting of these  
390 PRL units using the VCAD method, and a total of seven cell-assembly patterns were  
391 unbiasedly detected. We then align the temporal occurrences of these seven distinct  
392 patterns with the recorded videotape, and found that all of them could be temporally  
393 matched to distinct stages of the operant procedural task ([Figure 6A, the sequential](#)  
394 [ensemble patterns from three back-to-back trials were plotted](#)).

395 The PRL assembly-1 pattern was time-locked to the cue-onset when the stimulus  
396 aperture was transiently lit for 5-second, signaling the initiation of the five-choice visual  
397 discrimination task ([Figures 6A and 6B](#)). The peri-event spike raster and histogram  
398 confirmed that Assembly-1 cells exhibited significant changes upon the aperture *light on*  
399 ([Figure 6B, Stage-1](#)). For example, A top-ranking PRL unit increased its firing upon the  
400 light-on in the stimulus aperture (5-second duration). The firing of this attentive cell was  
401 then tapered off gradually ([Figure 6B, listed in 1](#)) Start. Upper PTSH subplots). Another

402 PRL cell suppressed its firing upon the stimulus aperture light-on (Figure 6B, 1) Start.  
403 Bottom PTSH subplots).

404 The PRL assembly-2 activation pattern was time-locked to the first cue-conditioned  
405 operant action, namely, running towards the light-lit stimulus aperture from the reward  
406 zone toward where the animal was originally located (Figure 6B, Stage-2; two PRL cells  
407 are shown). The orientation-firing polar histograms of comparing these cells' activity  
408 patterns during the five-choice visual discrimination operant task with those during home-  
409 cage running behavior showed that these firings were specific to the operant-conditioning  
410 task (Figure S9A).

411 The PRL assembly-3 pattern corresponded to the entering of the poke zone (the  
412 region near apertures) (Figure 6B, Stage-3). The place-firing analysis method confirmed  
413 that these large-weight responsive PRL units exhibited poke zone-specific spatial firing  
414 patterns (two cells were listed in the upper and lower subpanels, respectively).

415 Firing patterns of the PRL assembly-4 cells were time-centered around the  
416 preparation and the actions of nose-poking at the transiently lit apertures (Figure 6B,  
417 Stage-4). Peri-event spike histogram analysis revealed that these units exhibited dynamic  
418 firing changes around the nose-poking action. One representative PRL cell exhibited  
419 transient suppression during poking of the stimulus aperture (the upper PTSH subpanels),  
420 whereas another cell peaked its firing during the preparation phase of nose-poking (lower  
421 subpanels), consistent with the role of prefrontal cells in action planning of goal-execution.

422 The PRL assembly-5 pattern corresponded to the 4<sup>th</sup> action phase, namely,  
423 running back from the poke zone toward the reward zone where the food magazine was  
424 located (Figure 6B, Stage-5). The orientation-firing polar histograms revealed elevated  
425 firing changes by this type of member cells. Again, these PRL cells did not show any

426 significant firing changes when the mouse was running around in its home-cage  
427 environment ([Figure S9B](#)), suggesting that these cells were goal-oriented.

428 Increased firings of the PRL Assembly-6 cells were time-matched to the animal's  
429 arrival in the reward zone ([Figure 6B, Stage-6, two example cells were listed](#)). These cells'  
430 location-specific firing changes were evident from the PTSH plots again their spatial  
431 positions at the reward zone.

432 Finally, the Assembly-7 cells decoded by the VCAD method responded to  
433 consumption of food pellets. These PRL cells either increased or decreased their firings  
434 ([Figure 6B, Stage-7, two cells were shown](#)). While many of the above cells tended to be  
435 specific to a given phase of the five-choice operant-conditioning task, we noted that some  
436 of the cells participated in multiple cells assemblies. For example, some PRL cells  
437 belonged to both the running action assembly and stimulus-aperture zone assembly  
438 ([Figure S9C](#)). other PRL cells would exhibit bi-directional firing during navigation toward  
439 the aperture zone (Assembly #2) and reward zone (Assembly #5) ([Figure S9D](#)), or showed  
440 goal approaching-related firing increases in both the poke zone (Assembly #3) and the  
441 reward zone (Assembly #6) ([Figure S9E](#)). The above results demonstrated that the self-  
442 information coding concept was useful to discover a variety of prefrontal cell assemblies  
443 engaged in distinct stages of five-choice, attentive operant-conditioning task.

#### 444 **Critical variability-distribution boundaries for constructing efficient assembly code**

445 The ability to uncover a variety of cell assemblies from the multiple brain regions  
446 and under multiple conditions and tasks suggest that neural self-information coding  
447 represents a general process. The next critical question is whether there is a threshold or  
448 boundary in the IS variability distribution that can efficiently signal the shift from the high-  
449 probability ground state into the low-probability surprisal states that would give rise to

450 robust assembly-level neural coding. We approached this question by systematically  
451 shifting the positive- and negative-surprisal thresholds from 5% to 45% of the skewed ISI  
452 gamma distribution tails (Figure 7A). We calculated the cell-assembly coherence index  
453 by systematically comparing each assembly's temporal dynamics obtained from a given  
454 threshold with those obtained from all other thresholds. We found that the sliding of the  
455 surprisal thresholds or boundaries between 5-15% (ISI variability falling into the low-  
456 probability distribution tails) had little effect in terms of improving cell-assembly  
457 coherences, whereas assembly-pattern coherence fell apart as the surprisal thresholds  
458 shifted from 15% to 30% probability-distribution (Figure 7B). This steep transition around  
459 20% distribution skewed tail was consistently observed all 15 cell assemblies obtained  
460 from different brain regions, mental states and behavioral tasks (Figure S10). This  
461 strongly suggests that there is a conserved and critical boundary transition for constructing  
462 efficient self-information neural codes.

### 463 **Composition of self-information codes is region- and task-specific**

464 Finally, we explored how dynamic firing changes in putative principal excitatory  
465 cells and interneurons would contribute as positive or negative ISI surprisals to construct  
466 various cell assemblies (Figure 8A). We first calculated the percentages of positive or  
467 negative surprisals out of the total surprisal occurrences in each of the 15 cell-assembly  
468 patterns (Figures 8B-E). We then examined how many of these positive or negative  
469 surprisals were contributed by the putative excitatory neurons and interneurons. We noted  
470 that the majority of cell-assembly members identified in the present study were putative  
471 excitatory cells (70.73% in ACC cell assemblies, 78.8% of the total number of CA1 cell  
472 assemblies' members, and 80% in PRL cell assemblies), while the rest were fast-spiking  
473 interneurons and unclassified neural types (e.g. units with low firing rates and narrow spike  
474 waveforms). As expected, both excitatory neurons and fast-spiking interneurons can



475 contribute to positive and negative surprisals by increasing or decreasing their ISI time  
476 durations. However, we found that the percentages of positive and negative surprisals  
477 varied dramatically from one assembly pattern to another depending on the type(s) of the  
478 nature of mental states or tasks. For example, for coding sleep oscillation states such as  
479 theta cycles or ripples, spatial navigation, or processing distinct fearful experiences, these  
480 cortical and hippocampal assemblies consisted of overwhelmingly positive surprisals  
481 (70~96% of total surprisals) (Figure 8B-D). While excitatory cells contribute  
482 overwhelmingly to positive surprisals (due to their large proportion in terms of the total  
483 percentage of cell numbers), we noted that fast-spiking interneuron members can be  
484 dominant in producing both the positive and negative surprisals in some cases (e.g. CA1  
485 assemblies during sleep).

486 Most interestingly, various neural coding constructed by PRL cell-assembly  
487 patterns (Figure 8E, Assembly-1, 2, 3, 4, 6, and 7) during a five-choice visual  
488 discrimination operant-conditioning task as well as the CA1 Assembly-3 pattern encoding  
489 the downstate of sleep cycle (Figure 8C) were constructed by a large proportion of  
490 negative surprisals (40~50% of total surprisals). Therefore, the underlying compositions  
491 (i.e. positive and negative surprisals, as well as the percentages of excitatory neurons vs.  
492 interneurons) were specific to neural circuits, cognitive states, and behavioral tasks.

## 493 **Discussion**

494 Here, we tested a novel hypothesis that neuronal variability operates as the self-  
495 information generator and messenger to convey a variable amount of information in the  
496 form of ISI variability surprisal. Coordination of these surprisal ISIs in space (across a  
497 population of neurons) and time can intrinsically give rise to robust real-time cell-assembly  
498 code (26). This new concept can provide a new conceptual framework to explain how  
499 information is robustly signaled in real time by spike trains in the face of enormous  
500 neuronal variability. This adds to emerging view in the literature that neuronal variability  
501 is not simply synaptic and systems noise (2-5, 8-18, 24, 55-57).

502 We approached the question of whether firing variability reflects information coding  
503 or noise by systematically determining the difference or similarity in neuronal variability  
504 across the subcortical and cortical structures. This included the basolateral amygdala,  
505 hippocampal CA1, striatum, and three cortical regions such as the RSC, PRL, and ACC.  
506 In all cases, we found that variability remained at the similar level, consistent with the  
507 prediction that neuronal variability does not reflect the system noise which is expected to  
508 become larger as noise would accumulate over each relay. Our present work has also  
509 advanced the efforts in extracting the covert structure within the apparent noise in spike  
510 trains (9, 24, 55, 56).

511 One interesting aspect of this self-information coding concept is that the neural  
512 code is intrinsic to the neurons themselves (26), with no need for outside observers to set  
513 any reference point as typically used in the rate-code, population-code and temporal-code  
514 models. A variety of cell assemblies can indeed be identified in an unbiased manner -  
515 namely, without traditional reliance on averaging spike trains over external reference  
516 points, such as the stimulus delivery time, spatial location, local field potential or specific

517 actions of cognitive behaviors recorded during experiments. Such information or steps  
518 were only used after cell-assembly patterns were identified by the VCAD method, as a  
519 way to interpret and/or define the potential functions or contribution of each assembly  
520 patterns. For analyzing the datasets, we further enhanced the unbiased decoding method  
521 by developing a step by which independent-component signal sources was automatically  
522 determined using the minimal CV values in each dataset.

523 To test whether the self-information coding represents a general principle, we  
524 applied the VCAD strategy to spike datasets obtained from different brain regions under  
525 a set of representative cognitions reflecting the external experiences (encountering  
526 earthquake, elevator-drop, foot-shock, navigation and various actions during five-choice  
527 visual discrimination tasks) and internal states (sleep oscillation cycles). Selection of  
528 these mental states and cognitive tasks also allowed us to examine whether the self-  
529 information concept can underlie the encoding of both categorical variables (i.e. distinct  
530 fearful stimuli, or nose-poking and obtaining food pellets during the operant-conditioning  
531 tasks) and continuous variables (i.e. spatial navigation or sleep). Altogether, we have  
532 successfully uncovered 15 different cell assemblies covering a wide range of cognitive  
533 processing from the PRL, ACC, and hippocampal CA1.

534 As the first test-case for the self-information coding concept, we examined whether  
535 the VCAD method can be used to uncover cell assembly patterns encoding categorical  
536 variables such as earthquake, elevator-drop or mild electric foot-shock experiences. We  
537 selected the ACC due to its crucial role in processing emotions and fear behaviors (34,  
538 36, 58-60). By extracting self-information coding patterns from firing variability, we  
539 identified three distinct cell assemblies that were time-locked to these three fearful events.  
540 The contribution of the top ranking members to each cell assembly was quantitatively  
541 determined by shuffling experiments ([Figure S4A](#)), a feat that was not achievable for

542 principal component analysis (PCA) and multiple-discriminant analysis (MDA) (25). This  
543 quantitative assessment of membership information is highly valuable to better understand  
544 dynamics and contribution of individual neurons to the overall assembly pattern. Overall,  
545 we found that many ACC cells exhibited specific responses to a specific fearful experience  
546 (i.e. earthquake vs. foot-shock), whereas some cells responded in a combinatorial manner,  
547 such as coding for both earthquake and foot-shock or earthquake and free-fall, etc.  
548 Moreover, some ACC cells participated in all cell assemblies, reflecting by their  
549 responsiveness to all three fearful events. Such specific-to-general combinatorial cell  
550 assemblies in the ACC is highly consistent with the recent finding that the brain is  
551 organized by power-of-two permutation-based logic (61, 62).

552         The inclusion of hippocampal place cells was designed as a gold-standard test-  
553 case. Indeed, we showed that by assessing self-information patterns based on spike  
554 variability and then simply scanning through the recorded sessions, we uncovered CA1  
555 assembly patterns that were time-locked to either the westbound or eastbound journeys.  
556 We showed that each assembly contained classic place cells with a single salient place  
557 field (23, 28, 30, 31, 40, 49, 51, 52), but also cells with multiple place fields (63, 64).  
558 Unexpectedly, we also found that each assembly consisted of non-place cells such as  
559 cells responding preferentially to the start and finish state. Most interestingly, many of  
560 these start/finish cells were specific to either the westbound or eastbound journey,  
561 suggesting that their firing changes were not simply reflecting generic motion transition.  
562 Such properties are consistent with the reports that CA cells may also encode goal-related  
563 activity (65-67). Although the current study did not manipulate rewards (no pellets was  
564 represented during recording sessions, but only during training trials), the future  
565 investigation can be performed to examine such properties. Another unique aspect in  
566 uncovering of a variety of CA1 cells associated with spatial navigation behavior is that it

567 provides an unbiased means to potentially investigate a long-held, unresolved question  
568 as to how researchers should define place cell assembly and what size a cell assembly  
569 might be (28). The top-ranking membership, based on the highest contribution weights  
570 derived from VCAD analysis, listed in demixing matrix  $\mathbf{W}$ , can readily enable researchers  
571 to identify the ranking numbers as we have illustrated in each plot of [Figure 5](#) and [Figure](#)  
572 [S8](#).

573         The third test-case for the validity of self-information coding concept is to uncover  
574 cell assemblies that encode internal continuous variables, namely, sleep. We found the  
575 existence of three assembly patterns in the CA1 that were time-locked with three sleep  
576 oscillation cycles (theta, ripples, and downstate). Traditional classification based spike-  
577 phase coupling (theta coupled cells vs non-coupled cells), would predict that all theta-  
578 coupled cells may belong to the same cell assembly. Such a logic may also be extended  
579 to ripple-coupled cells vs. non-ripple coupled cells. While many theta-coupled or ripple-  
580 coupled cells were found in the CA1 datasets as nicely demonstrated in the literature (38-  
581 41, 45-48, 50, 52, 68, 69), surprisingly, many of them did not belong to this sleep theta  
582 cell assembly or the ripple cell-assembly. Their distinct memberships were further  
583 supported by their distinct correlations ([Figure S6](#)). Given the reported complexity and  
584 diversity of interneurons (45-47) and even pyramidal cell subtypes (70, 71), a future  
585 investigation with Cre-lox-mediated neurogenetics (72) and optogenetics (73-75) will be  
586 necessary to clearly define the identity of these putative pyramidal and interneuron  
587 subtypes.

588         To further illustrate the conceptual generality and practical value of self-information  
589 coding, we investigated neural coding underlying the five-choice visual discrimination  
590 operant-conditioning task as the final test-case. This is one of the most classic operant  
591 behavioral tasks (76), but rarely studied at neural coding level. This task requires a set of

592 complex cognitive functions, ranging from attentive and preparative behavior, cued-  
593 induced precise actions at the right time and right location (76-79). We discovered that  
594 the PrL cortex produced seven distinct cell assemblies during the performance of this task.  
595 These cell assembly patterns were time-locked to the onset of cues, and cue-induced  
596 behavioral actions, with sequential activation of each cell-assembly pattern according to  
597 each stage of five-choice visual discrimination operant-conditioning actions. Within the first  
598 cell assembly, there are multiple subtypes of cells that exhibited different time courses of  
599 responses. One type reacted ramping activity prior to the onset of the cue (light on in the  
600 stimulus aperture) (Figure 6B, the bottom PTSH subpanel). This type of PRL cells is  
601 consistent with a previous study reporting that activity of some ACC cell corresponded to  
602 the level of preparatory (pre-cue) attention in three-choice serial reaction time task in rats  
603 (78). Due to the space constraint and the focus of the current study, we limited our  
604 analysis to the general usefulness of self-information coding to uncover overall cell  
605 assemblies, the detailed analysis of various distinct subtypes of excitatory and  
606 interneurons will be highly interesting, especially in light of a recent finding that prefrontal  
607 parvalbumin (PV) neurons in control of attention (77). Moreover, also in the ACC using a  
608 simpler linear track food foraging task, Kvitsiani et al. demonstrated that the  
609 perisomatically targeting PV and the dendritically targeting somatostatin (SOM) neurons  
610 had dissociable inhibitory effects (79). A subtype of SOM neurons selectively responded  
611 at reward approach, whereas PV neurons responded at reward leaving and encoded  
612 preceding stay duration. A more detailed data analysis and selective manipulations,  
613 dedicated to the five-choice attentive operant conditioning, will be necessary for future  
614 studies to address these important issues.

615 In the present study, the self-information-based decoding approach revealed that  
616 PRL assemblies contained not only a variety of cells processing specific actions and/or

617 stages of the operant conditioning performances, but also recruited large proportions of  
618 negative surprisals to process various information including both categorical-variable  
619 patterns (“start,” “poking” and “reward”) and continuous-variable patterns (“running,” “poke  
620 zone,” “returning” and “reward zone”) (Figure 8E). This may provide a new insight into a  
621 broader picture regarding the cell-assembly nature of the inhibitory control performed by  
622 the prefrontal cortex (80, 81). Such a composition as seen in the PRL cortical assemblies  
623 in this attentional operant-conditioning tasks seemed to be different from the encoding of  
624 fearful experiences in the ACC (Figure 8D). This is consistent with the studies showing  
625 that fearful stimuli often increased firing or bursting in the prefrontal neurons (58, 60, 82).  
626 Such a difference in compositions in surprisal types and cell types strongly suggest that  
627 construction of self-information code is dependent on the tasks and brain regions. The  
628 difference in the positive vs. negative surprisal make-up is further illustrated in the cell  
629 assemblies related to sleep oscillations, which engaged much more interneurons (Figure  
630 8C). Taken together, these observations provide the first comparative pictures regarding  
631 the underlying compositions of cell assemblies, open the door to detailed and systematic  
632 investigations into the nature of cell-assembly coding specific to neural circuits, cognitive  
633 states, and behavioral tasks.

634         Finally, as a critical step to further understand how self-information code rises  
635 dynamically from neuronal variability, we investigated whether there is a critical boundary  
636 in transitioning ISI variability from high probability, low information state to low probability,  
637 high information state. Systematic analyses of all 15 cell assemblies using the sliding  
638 window technique revealed a steep transition in using ISI surprisals, around 20% of the  
639 skewed ISI gamma distribution tails, to generate efficient real-time cell-assembly codes.  
640 In another word, 20% of ISIs represented as low-probability surprisals for the construction  
641 of various population-level information patterns, whereas the majority (80%) of remaining

642 ISIs operate as the on-going low-information ground states. This 80/20 statistical rule is  
643 surprisingly conformed to the Pareto Principle (83), also known as the principle of factor  
644 sparsity, which states that, for many events, roughly 80% of the effects or consequences  
645 (i.e. information) stem from 20% of the causes (i.e. signs or entropy). This principle has  
646 been widely executed in a variety of systems, ranging from economics to software  
647 engineering and communications in which optimal data streams are implemented by the  
648 minimization of the numbers of signs while maximizing the transmitted information (83-86).  
649 It is noteworthy that while the ground state corresponds to the most probable ISI which  
650 carry less self-information but may still consume a lot of energy, these ground-state ISIs  
651 can play an extremely important role in enabling both the rapid responses to changes and  
652 ternary coding structure once combined with positive and negative surprisals (26). This  
653 ternary coding dynamics can lead to enormous information capacity and greater  
654 operational flexibility for neural clique assemblies which are reportedly organized by  
655 power-of-two-based permutation logic across various brain regions (61, 62).

656 In summary, we show that neuronal variability operates as a self-information  
657 generator and messenger to produce real-time ISI variability surprisals that can be used  
658 unbiasedly to uncover various cell assemblies corresponding to both categorical and  
659 continuous variables. These self-information-based neural codes are uniquely intrinsic to  
660 the neurons themselves, with no need for outside observers to set any reference point to  
661 manually mark external or internal inputs. Analysis of 15 distinct cell assemblies suggests  
662 the existence of conserved critical boundaries, seemly conforming to the Pareto principle,  
663 in utilizing ~20% of ISIs as statistical variability surprisals from which robust real-time cell-  
664 assembly patterns arise efficiently. The unique ability to identify numerous cell assemblies  
665 based on the unified self-information principle provided us with a rare and unbiased  
666 assessment for the compositions of cell-assembly codes.



## 667 **Materials and Methods**

### 668 **Ethics Statement**

669 All animal work described in the study was carried out in accordance with the  
670 guidelines laid down by the National Institutes of Health in the United States, regarding  
671 the care and use of animals for experimental procedures, and was approved by the  
672 Institutional Animal Care and Use Committee of Augusta University (Approval AUP  
673 number: BR07-11-001).

### 674 ***In vivo* recording in mice and data processing**

675 Tetrodes and headstages were constructed using the procedures as we have  
676 previously described (62, 87). The CA1 units were recorded male wild-type B6BCA/J  
677 mouse using the adjustable 96-channel recording array (with 48-channels bilaterally), as  
678 previously described (46), whereas 128-channel tetrode microdrives were used to record  
679 from the BLA, dorsal striatum, ACC, RSC, PrL bilaterally with 64 channels per hemisphere.  
680 For facilitating the identification of electrode array position, the electrode tips were dipped  
681 in fluorescent Neuro-Dil (Neuro-Dil, #60016, Red oily solid color, from Biotium, Inc.) which  
682 then can reveal the electrode track.

683 Neuronal activities were recorded by MAP system (multi-channel acquisition  
684 processor system, Plexon Inc., Dallas, TX) in the manner as previously described (46).  
685 Extracellular action potentials and local field potentials data were recorded simultaneously  
686 and digitized at 40 kHz and 1 kHz respectively. The artifact waveforms were removed  
687 and the spike waveform minima were aligned using the Offline Sorter 2.0 software (Plexon  
688 Inc., Dallas, TX), which resulted in more tightly clustered waveforms in principal  
689 component space. Spike-sortings were done with the MClust 3.3 program with an auto-

690 clustering method (KlustaKwik 1.5). Only units with clear boundaries and less than 0.5%  
691 of spike intervals within a 1 ms refractory period were selected. The stability of the in vivo  
692 recordings was judged by waveforms at the beginning, during, and after the experiments.  
693 Well-separated neurons were assessed by “Isolation Distance” and “Lratio” (88). Neurons  
694 whose “Isolation Distance” >15 and “L-ratio” <0.7 were selected for the present analyses.

### 695 **Variability-based cell assembly discovery (VCAD) method**

696 Three well-defined statistics were adopted to quantitatively describe the variability  
697 of the neuron’s ISI - namely, the coefficient of variation ( $CV$ ), skewness and kurtosis (see  
698 Supporting Information). The VCAD involves three distinct steps (also see Supporting  
699 Information): The first step was to use gamma distribution model to describe the variability  
700 of the neuron’s ISI (33). The second step was to use the independent-component analysis  
701 (ICA) method to decode the ensemble patterns from the population surprisal code by  
702 searching joint variability-surprisals. The third step was to identify corresponding cell  
703 assemblies by examining top large-weight neurons, which can be directly identified by  
704 their weights in demixing matrix  $\mathbf{W}$  of ICA analysis.

### 705 **Fearful events and corresponding data analysis**

706 Mice were subjected to three fearful episodic events, earthquakes, foot-shocks,  
707 and free-fall drops (see Supporting Information for detailed description). These episodic  
708 stimuli are fearful as evidenced from physiological indications including a rapid increase  
709 in heart rates as well as reduced heart rate variability (37, 89). To maintain the consistency  
710 of stimulation timing (minimizing the possible prediction of upcoming stimuli), the stimuli  
711 were triggered by a computer and delivered at randomized intervals within 1-3 minutes.  
712 After the completion of all fearful event sessions, the mouse was placed back into the  
713 home cages.

## 714 **Sleep and corresponding data analysis**

715 Data was recorded when the mouse was sleeping in the home cage. The recorded  
716 local field potentials (LFP) were first processed by the FPAlign (a utility program provided  
717 by Plexon Inc.) to correct the filter induced phase delays. LFP channels recorded in CA1  
718 pyramidal cell layer were selected by judging the maximum yield of ripple during animal  
719 slow-wave sleep (SWS), and comparing the coherence in the theta-frequency and  
720 gamma-frequency band (90). Further analyses were carried out with these LFP data off-  
721 line by custom-written MATLAB (Mathworks) programs. The local field potential was band  
722 passed at Delta (2-4 Hz), Theta (4-10 Hz), low Gamma (25-90 Hz), fast Gamma (90-130  
723 Hz) and hippocampal ripples (130-200 Hz) by hamming window based FIR filters with  
724 order of 30 (see Supporting Information for detailed description).

## 725 **Linear track and corresponding data analysis**

726 A linear track experiment used a 100cm×10cm closed runway. The exploration  
727 duration was 20 minutes. Real-time positions of the mouse were tracked by CinePlex  
728 Behavioral Research Systems (Plexon Inc., Dallas, TX) automatically. Place fields were  
729 defined as a set of ≥5 contiguous pixels with a firing rate above two standard deviations  
730 of the mean firing rate. All spatial firing plots were smoothed with 5×1 Gaussian  
731 smoothing filter using the Matlab software (see Supporting Information for detailed  
732 description).

## 733 **Five-choice visual discrimination operant-conditioning task and corresponding** 734 **data analysis**

735 The animal was introduced to a custom-designed test chamber equipped with five  
736 response apertures that can illuminate, and a food magazine to deliver reward. A trial was  
737 initiated by the mouse entering the food magazine. A brief light-stimulus was then  
738 presented in one of five possible apertures after a 5-s inter-trial interval (ITI) had elapsed.

739 The mouse was required to scan the five apertures for the appearance of the light-stimulus  
740 and to respond in the "correct" aperture with a nose-poke response in order to earn a  
741 single food pellet delivered in the food magazine. If the mouse responded before the  
742 stimulus ("premature response") or in an adjacent, incorrect aperture ("incorrect  
743 response"), a 5-s time-out (TO) period was introduced by extinguishing the house light  
744 and not providing a food reward. Failure to respond within the limited hold (LH) period  
745 resulted in an "omission" and a subsequent 5-s TO period. After collecting the reward or -  
746 on punished trials - at the end of the TO period, a head entry in the food magazine would  
747 start a new trial. The mouse was pre-trained to achieve  $\geq 50$  correct trials within 30  
748 minutes with  $>80\%$  accuracy and  $<20\%$  omissions before recording from prefrontal cortex  
749 began. Animal's movements were recorded by CinePlex Behavioral Research Systems  
750 (Plexon Inc., Dallas, TX), and the animal's locations and head directions were tracked  
751 manually afterward. Detailed protocol was described in Supporting Information.

752 **Author Contributions:** J.Z.T. conceived and designed the project with M.L.. J.Z.T.  
753 designed the experiments with M.L., K.X., H.K., G.E.F., and J.L.. The research was  
754 performed as follows: K.X. recorded from the ACC and PRL datasets; G.E.F. from the  
755 RSC; Jun Liu from the BLA; D.W. from the striatum, H.K. for the CA1. M.L., F.Z., H.K.,  
756 Z.S., L.C. and Y.M. for data analyses together with J.Z.T.. J.Z.T. and M.L. wrote the paper  
757 with input from all other.

758 **Acknowledgments:** This work is supported by an NIH grant (R01NS079774), GRA  
759 equipment grant to J.Z.T., Shanghai Youth Science and Technology Sail Project  
760 (16YF1415200) to Z.S., M.L. and the Brain Decoding Center grant Yunnan Science  
761 Commission (2014DG002) to F.Z. and J.Z.T. We thank Fengying Huang for maintaining  
762 the mouse colony and training mice for five-choice operant-conditioning tasks, and Sandra  
763 E. Jackson for proofreading this manuscript.

## 764 **References**

- 765 1. Adrian ED. The basis of sensation. 1928.
- 766 2. Faisal AA, Selen LP, Wolpert DM. Noise in the nervous system. *Nat Rev Neurosci.*  
767 2008;9(4):292-303.
- 768 3. Rolls E, Deco G. The noisy brain. Stochastic dynamics as a principle of brain  
769 function(Oxford Univ Press, UK, 2010). 2010.
- 770 4. Shadlen MN, Newsome WT. Noise, neural codes and cortical organization. *Curr*  
771 *Opin Neurobiol.* 1994;4(4):569-79.
- 772 5. Stein RB, Gossen ER, Jones KE. Neuronal variability: noise or part of the signal?  
773 *Nat Rev Neurosci.* 2005;6(5):389-97.
- 774 6. Averbeck BB, Latham PE, Pouget A. Neural correlations, population coding and  
775 computation. *Nat Rev Neurosci.* 2006;7(5):358-66.
- 776 7. Kanitscheider I, Coen-Cagli R, Pouget A. Origin of information-limiting noise  
777 correlations. *Proc Natl Acad Sci U S A.* 2015;112(50):E6973-82.
- 778 8. Lee D, Port NL, Kruse W, Georgopoulos AP. Variability and correlated noise in the  
779 discharge of neurons in motor and parietal areas of the primate cortex. *J Neurosci.*  
780 1998;18(3):1161-70.
- 781 9. Hartmann C, Lazar A, Nessler B, Triesch J. Where's the Noise? Key Features of  
782 Spontaneous Activity and Neural Variability Arise through Learning in a Deterministic  
783 Network. *PLoS Comput Biol.* 2015;11(12):e1004640.
- 784 10. Kohn A, Coen-Cagli R, Kanitscheider I, Pouget A. Correlations and Neuronal  
785 Population Information. *Annu Rev Neurosci.* 2016;39:237-56.
- 786 11. Abbott L, Sejnowski TJ. Neural codes and distributed representations: foundations  
787 of neural computation: Mit Press; 1999.
- 788 12. Mainen ZF, Sejnowski TJ. Reliability of spike timing in neocortical neurons.  
789 *Science.* 1995;268(5216):1503-6.

- 790 13. Abbott LF, Dayan P. The effect of correlated variability on the accuracy of a  
791 population code. *Neural Comput.* 1999;11(1):91-101.
- 792 14. Arieli A, Sterkin A, Grinvald A, Aertsen A. Dynamics of ongoing activity:  
793 explanation of the large variability in evoked cortical responses. *Science.*  
794 1996;273(5283):1868-71.
- 795 15. Churchland MM, Yu BM, Cunningham JP, Sugrue LP, Cohen MR, Corrado GS, et  
796 al. Stimulus onset quenches neural variability: a widespread cortical phenomenon. *Nat*  
797 *Neurosci.* 2010;13(3):369-78.
- 798 16. Lin IC, Okun M, Carandini M, Harris KD. The Nature of Shared Cortical Variability.  
799 *Neuron.* 2015;87(3):644-56.
- 800 17. Luczak A, Bartho P, Harris KD. Gating of sensory input by spontaneous cortical  
801 activity. *The Journal of neuroscience : the official journal of the Society for Neuroscience.*  
802 2013;33(4):1684-95.
- 803 18. Marcos E, Pani P, Brunamonti E, Deco G, Ferraina S, Verschure P. Neural  
804 variability in premotor cortex is modulated by trial history and predicts behavioral  
805 performance. *Neuron.* 2013;78(2):249-55.
- 806 19. Petersen CCH, Hahn TTG, Mehta M, Grinvald A, Sakmann B. Interaction of  
807 sensory responses with spontaneous depolarization in layer 2/3 barrel cortex. *P Natl Acad*  
808 *Sci USA.* 2003;100(23):13638-43.
- 809 20. Saberi-Moghadam S, Ferrari-Toniolo S, Ferraina S, Caminiti R, Battaglia-Mayer A.  
810 Modulation of Neural Variability in Premotor, Motor, and Posterior Parietal Cortex during  
811 Change of Motor Intention. *The Journal of neuroscience : the official journal of the Society*  
812 *for Neuroscience.* 2016;36(16):4614-23.
- 813 21. Scholvinck ML, Saleem AB, Benucci A, Harris KD, Carandini M. Cortical state  
814 determines global variability and correlations in visual cortex. *The Journal of neuroscience :*  
815 *the official journal of the Society for Neuroscience.* 2015;35(1):170-8.
- 816 22. Wehr M, Zador AM. Balanced inhibition underlies tuning and sharpens spike timing  
817 in auditory cortex. *Nature.* 2003;426(6965):442-6.

- 818 23. Fenton AA, Muller RU. Place cell discharge is extremely variable during individual  
819 passes of the rat through the firing field. *P Natl Acad Sci USA*. 1998;95(6):3182-7.
- 820 24. Johnson A, Fenton AA, Kentros C, Redish AD. Looking for cognition in the  
821 structure within the noise. *Trends Cogn Sci*. 2009;13(2):55-64.
- 822 25. Lin L, Osan R, Tsien JZ. Organizing principles of real-time memory encoding:  
823 neural clique assemblies and universal neural codes. *Trends Neurosci*. 2006;29(1):48-57.
- 824 26. Li M, Tsien J. Neural Code—Neural Self-Information Theory on How Cell-Assembly  
825 Code Rises from Spike Time and Neuronal Variability. *Frontiers in Cellular Neuroscience*.  
826 2017;11:236.
- 827 27. Hebb DO. *The organization of behavior: A neuropsychological approach*: John  
828 Wiley & Sons; 1949.
- 829 28. Buzsaki G. Neural syntax: cell assemblies, synapsembles, and readers. *Neuron*.  
830 2010;68(3):362-85.
- 831 29. Eggermont JJ. Is there a neural code? *Neurosci Biobehav Rev*. 1998;22(2):355-  
832 70.
- 833 30. Harris KD, Csicsvari J, Hirase H, Dragoi G, Buzsaki G. Organization of cell  
834 assemblies in the hippocampus. *Nature*. 2003;424(6948):552-6.
- 835 31. Maurer AP, Cowen SL, Burke SN, Barnes CA, McNaughton BL. Organization of  
836 hippocampal cell assemblies based on theta phase precession. *Hippocampus*.  
837 2006;16(9):785-94.
- 838 32. Palm G. Towards a theory of cell assemblies. *Biol Cybern*. 1981;39(3):181-94.
- 839 33. Maimon G, Assad JA. Beyond Poisson: increased spike-time regularity across  
840 primate parietal cortex. *Neuron*. 2009;62(3):426-40.
- 841 34. Xie K, Kuang H, Tsien JZ. Mild blast events alter anxiety, memory, and neural  
842 activity patterns in the anterior cingulate cortex. *PLoS One*. 2013;8(5):e64907.
- 843 35. Bliss TVP, Collingridge GL, Kaang B-K, Zhuo M. Synaptic plasticity in the anterior  
844 cingulate cortex in acute and chronic pain. *Nat Rev Neurosci*. 2016;17(8):485-96.

- 845 36. Steenland HW, Li X-Y, Zhuo M. Predicting aversive events and terminating fear in  
846 the mouse anterior cingulate cortex during trace fear conditioning. *The Journal of*  
847 *neuroscience : the official journal of the Society for Neuroscience*. 2012;32(3):1082-95.
- 848 37. Liu J, Wei W, Kuang H, Tsien JZ, Zhao F. Heart rate and heart rate variability  
849 assessment identifies individual differences in fear response magnitudes to earthquake,  
850 free fall, and air puff in mice. *PLoS One*. 2014;9(3):e93270.
- 851 38. Cantero JL, Atienza M, Stickgold R, Kahana MJ, Madsen JR, Kocsis B. Sleep-  
852 dependent theta oscillations in the human hippocampus and neocortex. *The Journal of*  
853 *neuroscience : the official journal of the Society for Neuroscience*. 2003;23(34):10897-903.
- 854 39. Colgin LL. Rhythms of the hippocampal network. *Nat Rev Neurosci*.  
855 2016;17(4):239-49.
- 856 40. Csicsvari J, Hirase H, Czurko A, Mamiya A, Buzsaki G. Oscillatory coupling of  
857 hippocampal pyramidal cells and interneurons in the behaving Rat. *The Journal of*  
858 *neuroscience : the official journal of the Society for Neuroscience*. 1999;19(1):274-87.
- 859 41. Fox SE, Wolfson S, Ranck JB, Jr. Hippocampal theta rhythm and the firing of  
860 neurons in walking and urethane anesthetized rats. *Exp Brain Res*. 1986;62(3):495-508.
- 861 42. Chen G, Wang LP, Tsien JZ. Neural population-level memory traces in the mouse  
862 hippocampus. *PLoS One*. 2009;4(12):e8256.
- 863 43. Sara SJ. The locus coeruleus and noradrenergic modulation of cognition. *Nat Rev*  
864 *Neurosci*. 2009;10(3):211-23.
- 865 44. Zhang H, Chen G, Kuang H, Tsien JZ. Mapping and deciphering neural codes of  
866 NMDA receptor-dependent fear memory engrams in the hippocampus. *PLoS One*.  
867 2013;8(11):e79454.
- 868 45. Klausberger T, Somogyi P. Neuronal diversity and temporal dynamics: the unity of  
869 hippocampal circuit operations. *Science*. 2008;321(5885):53-7.
- 870 46. Kuang H, Lin L, Tsien JZ. Temporal dynamics of distinct CA1 cell populations  
871 during unconscious state induced by ketamine. *PLoS One*. 2010;5(12):e15209.



- 872 47. Somogyi P, Klausberger T. Defined types of cortical interneurone structure space  
873 and spike timing in the hippocampus. *J Physiol.* 2005;562(Pt 1):9-26.
- 874 48. Diba K, Buzsaki G. Forward and reverse hippocampal place-cell sequences during  
875 ripples. *Nat Neurosci.* 2007;10(10):1241-2.
- 876 49. Dupret D, O'Neill J, Pleydell-Bouverie B, Csicsvari J. The reorganization and  
877 reactivation of hippocampal maps predict spatial memory performance. *Nat Neurosci.*  
878 2010;13(8):995-1002.
- 879 50. Pastalkova E, Itskov V, Amarasingham A, Buzsaki G. Internally generated cell  
880 assembly sequences in the rat hippocampus. *Science.* 2008;321(5894):1322-7.
- 881 51. Trimper JB, Trettel SG, Hwaun E, Colgin LL. Methodological Caveats in the  
882 Detection of Coordinated Replay between Place Cells and Grid Cells. *Front Syst Neurosci.*  
883 2017;11.
- 884 52. Wilson MA, McNaughton BL. Reactivation of hippocampal ensemble memories  
885 during sleep. *Science.* 1994;265(5172):676-9.
- 886 53. Gupta AS, van der Meer MA, Touretzky DS, Redish AD. Hippocampal replay is not  
887 a simple function of experience. *Neuron.* 2010;65(5):695-705.
- 888 54. Kelemen E, Fenton AA. Coordinating different representations in the hippocampus.  
889 *Neurobiol Learn Mem.* 2016;129:50-9.
- 890 55. Brown EN, Kass RE, Mitra PP. Multiple neural spike train data analysis: state-of-  
891 the-art and future challenges. *Nat Neurosci.* 2004;7(5):456-61.
- 892 56. Ermentrout GB, Galan RF, Urban NN. Reliability, synchrony and noise. *Trends*  
893 *Neurosci.* 2008;31(8):428-34.
- 894 57. Masquelier T. Neural variability, or lack thereof. *Front Comput Neurosci.* 2013;7:7.
- 895 58. Giustino TF, Fitzgerald PJ, Maren S. Fear Expression Suppresses Medial  
896 Prefrontal Cortical Firing in Rats. *PloS one.* 2016;11(10):e0165256.
- 897 59. Kim JJ, Jung MW. Neural circuits and mechanisms involved in Pavlovian fear  
898 conditioning: a critical review. *Neurosci Biobehav Rev.* 2006;30(2):188-202.

- 899 60. Zhuo M. Neural Mechanisms Underlying Anxiety-Chronic Pain Interactions.  
900 Trends Neurosci. 2016;39(3):136-45.
- 901 61. Tsien JZ. A Postulate on the Brain's Basic Wiring Logic. Trends Neurosci.  
902 2015;38(11):669-71.
- 903 62. Xie K, Fox GE, Liu J, Lyu C, Lee JC, Kuang H, et al. Brain Computation Is  
904 Organized via Power-of-Two-Based Permutation Logic. Front Syst Neurosci. 2016;10:95.
- 905 63. Fenton AA, Kao H-Y, Neymotin SA, Olypher A, Vayntrub Y, Lytton WW, et al.  
906 Unmasking the CA1 ensemble place code by exposures to small and large environments:  
907 more place cells and multiple, irregularly arranged, and expanded place fields in the larger  
908 space. The Journal of neuroscience : the official journal of the Society for Neuroscience.  
909 2008;28(44):11250-62.
- 910 64. Park E, Dvorak D, Fenton AA. Ensemble place codes in hippocampus: CA1, CA3,  
911 and dentate gyrus place cells have multiple place fields in large environments. PloS one.  
912 2011;6(7):e22349.
- 913 65. Hok V, Lenck-Santini P-P, Roux S, Save E, Muller RU, Poucet B. Goal-related  
914 activity in hippocampal place cells. The Journal of neuroscience : the official journal of the  
915 Society for Neuroscience. 2007;27(3):472-82.
- 916 66. Ito HT, Zhang S-J, Witter MP, Moser EI, Moser M-B. A prefrontal-thalamo-  
917 hippocampal circuit for goal-directed spatial navigation. Nature. 2015;522(7554):50-5.
- 918 67. Wikenheiser AM, Redish AD. Changes in reward contingency modulate the trial-  
919 to-trial variability of hippocampal place cells. J Neurophysiol. 2011;106(2):589-98.
- 920 68. Eschenko O, Ramadan W, Molle M, Born J, Sara SJ. Sustained increase in  
921 hippocampal sharp-wave ripple activity during slow-wave sleep after learning. Learn Mem.  
922 2008;15(4):222-8.
- 923 69. Sara SJ. Sleep to Remember. The Journal of neuroscience : the official journal of  
924 the Society for Neuroscience. 2017;37(3):457-63.
- 925 70. Graves AR, Moore SJ, Bloss EB, Mensh BD, Kath WL, Spruston N. Hippocampal  
926 pyramidal neurons comprise two distinct cell types that are countermodulated by  
927 metabotropic receptors. Neuron. 2012;76(4):776-89.

- 928 71. Mizuseki K, Diba K, Pastalkova E, Buzsaki G. Hippocampal CA1 pyramidal cells  
929 form functionally distinct sublayers. *Nat Neurosci*. 2011;14(9):1174-81.
- 930 72. Tsien JZ. Cre-Lox Neurogenetics: 20 Years of Versatile Applications in Brain  
931 Research and Counting. *Front Genet*. 2016;7:19.
- 932 73. Gan J, Weng S-M, Pernia-Andrade AJ, Csicsvari J, Jonas P. Phase-Locked  
933 Inhibition, but Not Excitation, Underlies Hippocampal Ripple Oscillations in Awake Mice  
934 InVivo. *Neuron*. 2017;93(2):308-14.
- 935 74. Li Y, Xu J, Liu Y, Zhu J, Liu N, Zeng W, et al. A distinct entorhinal cortex to  
936 hippocampal CA1 direct circuit for olfactory associative learning. *Nat Neurosci*.  
937 2017;20(4):559-70.
- 938 75. Nagode DA, Tang A-H, Yang K, Alger BE. Optogenetic identification of an intrinsic  
939 cholinergically driven inhibitory oscillator sensitive to cannabinoids and opioids in  
940 hippocampal CA1. *J Physiol*. 2014;592(1):103-23.
- 941 76. Bari A, Dalley JW, Robbins TW. The application of the 5-choice serial reaction time  
942 task for the assessment of visual attentional processes and impulse control in rats. *Nat*  
943 *Protoc*. 2008;3(5):759-67.
- 944 77. Kim H, Ahrlund-Richter S, Wang X, Deisseroth K, Carlen M. Prefrontal  
945 Parvalbumin Neurons in Control of Attention. *Cell*. 2016;164(1-2):208-18.
- 946 78. Totah NKB, Kim YB, Homayoun H, Moghaddam B. Anterior cingulate neurons  
947 represent errors and preparatory attention within the same behavioral sequence. *The*  
948 *Journal of neuroscience : the official journal of the Society for Neuroscience*.  
949 2009;29(20):6418-26.
- 950 79. Yin HH. Action, time and the basal ganglia. *Philos Trans R Soc Lond B Biol Sci*.  
951 2014;369(1637):20120473.
- 952 80. Laubach M. A comparative perspective on executive and motivational control by  
953 the medial prefrontal cortex. *Neural Basis of Motivational and Cognitive Control*. 2011:95.
- 954 81. Miller EK. The prefrontal cortex and cognitive control. *Nat Rev Neurosci*.  
955 2000;1(1):59-65.

- 956 82. Giustino TF, Maren S. The Role of the Medial Prefrontal Cortex in the Conditioning  
957 and Extinction of Fear. *Front Behav Neurosci.* 2015;9:298.
- 958 83. Hardy M. Pareto's law. *The Mathematical Intelligencer.* 2010;32(3):38-43.
- 959 84. Iqbal M, Rizwan M, editors. Application of 80/20 rule in software engineering  
960 Waterfall Model. *Information and Communication Technologies, 2009 ICICT'09*  
961 *International Conference on; 2009: IEEE.*
- 962 85. Juran JM. Pareto, lorenz, cournot, bernoulli, juran and others. 1950.
- 963 86. Ultsch A. Proof of Pareto's 80/20 law and Precise Limits for ABC-Analysis. *Data*  
964 *Bionics Research Group University of Marburg/Lahn, Germany.* 2002:1-11.
- 965 87. Lin L, Chen G, Xie K, Zaia KA, Zhang S, Tsien JZ. Large-scale neural ensemble  
966 recording in the brains of freely behaving mice. *J Neurosci Methods.* 2006;155(1):28-38.
- 967 88. Schmitzer-Torbert N, Jackson J, Henze D, Harris K, Redish AD. Quantitative  
968 measures of cluster quality for use in extracellular recordings. *Neuroscience.*  
969 2005;131(1):1-11.
- 970 89. Liu J, Wei W, Kuang H, Zhao F, Tsien JZ. Changes in heart rate variability are  
971 associated with expression of short-term and long-term contextual and cued fear  
972 memories. *PLoS One.* 2013;8(5):e63590.
- 973 90. Buzsaki G, Buhl DL, Harris KD, Csicsvari J, Czeh B, Morozov A. Hippocampal  
974 network patterns of activity in the mouse. *Neuroscience.* 2003;116(1):201-11.

975 **Titles and legends to figures**

976 **Figure 1. Neuronal variability remained similar across 6 different brain regions and**  
977 **was dramatically diminished upon anesthesia.**

978 (A) Neuronal variability can be assessed by inter-spike intervals (ISIs) distribution which  
979 follows long-tailed, skewed Gamma distribution. (B) The principle cells in six different  
980 brain regions show similar variability patterns. The basolateral amygdala (BLA), CA1,  
981 striatum (STR), retrosplenial cortex (RSC), prelimbic cortex (PRL), and anterior cingulate  
982 cortex (ACC). Numbers of principal cells from each brain region were indicated in the  
983 upper right box. Firing variability was assessed by Kurtosis, Skewness, and CV. (C)  
984 Neuronal variabilities were greatly reduced under anesthesia. Variability in the CA1 (left  
985 subpanel) and BLA (Right subpanel) was compared in using the same set of neurons  
986 recorded before (red circles) and after ketamine/dormiter injection (blue circles). Numbers  
987 of pyramidal cells used for analyses were listed on the upper left corner.

988 **Figure 2. The strategy to apply the Self-Information Coding concept to decode cell**  
989 **assembly patterns in an unbiased manner.**

990 (A) Step 1: Converting spike variability into real-time variability surprisal. The spike  
991 activities of 10 simultaneously-recorded cells are illustrated in the left subpanel, the ISIs  
992 of each cell is fitted by the Gamma distribution model which assigns each ISI with a  
993 probability. Based on the fitted Gamma distribution model, two boundaries are then  
994 assessed (as shown in the middle subplot) to generate three states; that is, positive-  
995 surprisal state (short ISIs), negative-surprisal state (long ISIs), and low self-information  
996 ground state. As such, neuron's spike trains can be converted into ternary surprisal codes  
997 [excitation surprisal as 1 (red blocks), ground state as 0 (yellow blocks) and inhibition  
998 surprisal as -1 (blue blocks)]. (B) Step 2: Uncovering joint surprisal patterns. Taking  
999 population ternary surprisal code as input, the ensemble patterns were unbiasedly  
1000 discovered by the blind source separation (BSS) method which aims for searching joint  
1001 variability-surprisals in both space (across simultaneously-recorded cells) and time  
1002 (moment-to-moment dynamics). (C) Step 3: Identifying corresponding cell assemblies.  
1003 For each decoded independent signal source, neurons' information contributions are  
1004 scaled quantitatively by the absolute values in the weight matrix  $W$  of BSS analysis  
1005 (shown in the left subpanel), thus, corresponding cell assemblies can be identified by  
1006 picking up top-weight cells (right subpanel).

1007 **Figure 3. Identification of three ACC cell assemblies corresponding to three distinct**  
1008 **fearful experiences.**

1009 (A) Three cell assemblies are decoded from ACC during fearful startle experiment. Each  
1010 cell assembly corresponds to the occurrences of one of three fearful startle events (Six  
1011 trials per event, as shown by six purple bars above each ensemble patterns). (B) Left  
1012 panel: Cell membership analyses of Assembly-1 show that some neurons participate in  
1013 more than one cell assemblies, using a specific-to-general combinatorial coding manner.  
1014 Right panel: illustration of identified Assembly-1 member cells engaged in representing  
1015 Earthquake (in red color). Non-member cells are in gray. The numerical number on the  
1016 top-right corner of each cell represents the unit simultaneously recorded, arranged from  
1017 the 128-channel array. (C) Assembly-2 corresponding to Foot-shock. (D) Assembly-3  
1018 corresponding to Free-fall.

1019 **Figure 4. Three distinct CA1 cell assemblies identified from the different sleep**  
1020 **cycles.**

1021 (A) Three information sources (ISs)-based ensemble patterns are decoded by VCAD  
1022 method during animal's sleep. (B) Assembly-1 (Corresponding to theta oscillation stage).  
1023 The upper bar shows the activities of decoded theta ensemble pattern, the red blocks  
1024 denote the activations of Assembly-1, while the blue blocks represent its inactivity. The  
1025 power spectrogram below shows the simultaneously-recorded local field potential activity  
1026 within 0-15 Hz frequency band, the theta band (6-10 Hz) is highlighted by white lines. The  
1027 decoded ensemble pattern is in complete correspondence with the elevated theta band  
1028 activity (as shown by the red dashed lines). (C) Assembly-2 (corresponding to ripples).  
1029 (D) Assembly-3 (corresponding to DOWN-state). Z-scores of power for well-defined  
1030 frequency bands (Delta, Theta, Low Gamma, High Gamma, and Ripples), where the black  
1031 line (Z-score = 0) denotes the mean power in each band. It can be observed that the  
1032 ensemble pattern of Assembly-3 is consistently time-locked with the troughs of these LFP  
1033 frequency bands. (E) Analyses of different cell types consist in Assembly-1. Most cell  
1034 members of Assembly-1 are putative interneurons. The ripple-band (120-200 Hz) power  
1035 spectrogram is shown in lower subpanel for verifying the accuracy of cell assembly  
1036 decoding result. Nine ripple waveforms are replotted below. (F) Cell-type analyses show  
1037 that top Assembly-2 cells were mostly putative pyramidal cells. (G) Cell-type analyses of  
1038 Assembly-3 also shows that its members were mostly interneurons.



1039 **Figure 5. Unbiased identification of two navigation-related CA1 cell assemblies**  
1040 **during linear track exploration.**

1041 (A) Two information sources (ISs)-based ensemble patterns were decoded by VCAD  
1042 method. The blue/red blocks denote the activations of each corresponding ensemble  
1043 patterns. (B) The animal's trajectory within 80s during the linear track experiment (1-m  
1044 length). Blue dots and arrows denote the decoded ensemble pattern corresponding to  
1045 "Westbound," while red dots and arrows are for "Eastbound." (C-F) Firing patterns of top-  
1046 weight member cells in two cell assemblies. These top-weight cells fall into four categories:  
1047 place cells with single place field (C), place cells with two place fields (D), differential cells  
1048 (E) which exhibited significantly higher firing rates in one of the directions than the opposite  
1049 direction,  $P < 0.001$  through pairwise t-test). (F), Start & finish cells that suppressed their  
1050 firings during the navigation. Two cells exhibiting westbound- or eastbound-specificity are  
1051 shown.

1052 **Figure 6. Seven PrL cell assemblies were identified during five-choice**  
1053 **discrimination operant-conditioning task.**

1054 (A) Activations of seven decoded ensemble patterns during three back-to-back trials of  
1055 five-choice discrimination operant-conditioning task, each ensemble pattern corresponds  
1056 to one of seven distinct stages of the operant-procedural task. (B) Illustrations of seven  
1057 decoded ensemble patterns and examples of top large-weight cells in each cell assembly.  
1058 **Stage-1 (Start)** corresponds to the moment which visual stimulus (the illumination of the  
1059 aperture light on) was presented in one of five spatial locations to start a trial. Peri-event  
1060 rasters/histograms of two example cells exhibited significant increased\decreased firing  
1061 activities upon the illumination of the aperture light (time = 0). These two cells were anti-  
1062 correlated, the correlation coefficient between these two cells was -0.337. **Stage-2**  
1063 **(Running)** corresponds to the route when the animal runs from food magazine region to  
1064 response aperture region. Orientation-firing polar histograms of two large-weight cells  
1065 show obvious orientational preferences. **Stage-3 (Poke zone)** activated when the animal  
1066 was near the response apertures. Apparent spatial-specificity firing patterns of top-  
1067 contributed cells were observed when the place-cell analysis was applied. **Stage-4**  
1068 **(Poking)** corresponds to the poking of the response aperture. Obvious firing pattern  
1069 changes were observed upon the poking (time =0) in the peri-event rasters/histograms of  
1070 top-contributed cells. **Stage-5 (Returning)** activates when the animal was running back  
1071 from the response apertures to the food magazine. Obvious orientational preferences of  
1072 cell-assembly members were observed in the orientation-firing-polar-histogram analyses.  
1073 **Stage-6 (Reward zone)** corresponds to the locations near food magazine. Place cell  
1074 analyses verify that the cell-assembly members exhibited higher firing probabilities within  
1075 the location near the food magazine. **Stage-7 (Reward)** corresponds to the actions of  
1076 collecting the reward pellet. Increased/decreased firing activities of two cell-assembly  
1077 members are shown in the peri-eventrasters/histograms.

1078 **Figure 7. Surprisal boundaries for giving rise to robust real-time cell-assembly**  
1079 **codes.**

1080 (A) Illustration of applying the sliding-window technique to shift the positive- and negative-  
1081 surprisal thresholds from 5% (low occurrence probability) to 45% (high occurrence  
1082 probability) of the skewed ISI gamma distribution tails. (B) Shown is the averaged cell-  
1083 assembly coherence matrix of all 15 cell assemblies. Colors in the matrixes denote  
1084 corresponding cell-assembly coherence indexes. Robust cell-assembly patterns were  
1085 observed with an occurrence probability of less than 20% (as denoted by white square  
1086 frames in cell-assembly coherence matrixes).

1087

1088 **Figure 8. Cell-assembly codes were made of different compositions of positive- and**  
1089 **negative-surprisals generated by excitatory cells and fast-spiking interneurons.**

1090 (A) Based on the variability-surprisal distribution, spike activities of cell-assembly can lead  
1091 to positive-surprisals or negative-surprisals. (B-E) Percentages of positive- (red bars) or  
1092 negative-surprisals (blue bars) used to generate distinct cell-assembly codes. The pie  
1093 charters showed the percentages of positive surprisals (in red bars) were generated from  
1094 excitatory neurons (yellow) or interneurons (purple). Similarly, the percentages of  
1095 negative-surprisals (in blue bars) were generated from excitatory neurons (yellow) or  
1096 interneurons (purple).

**Figure 1**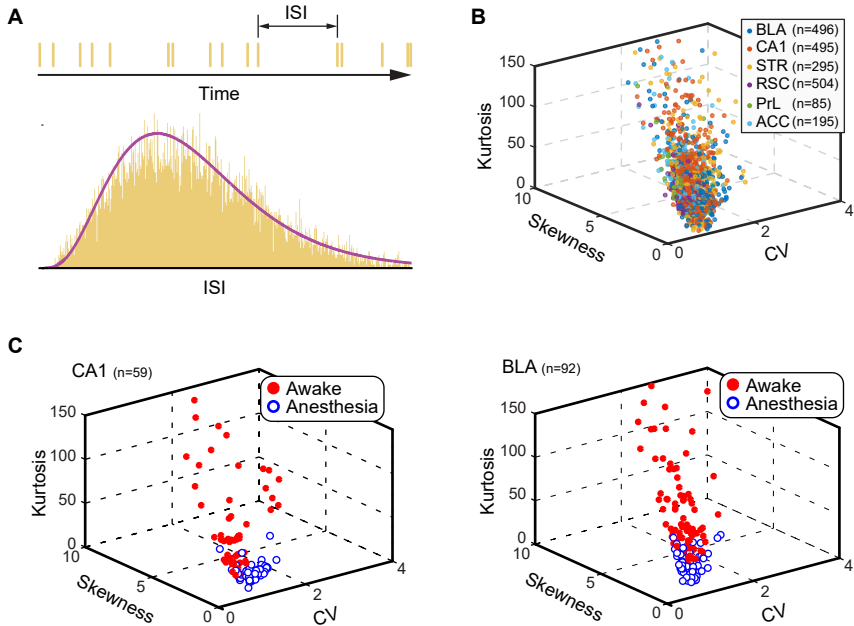

**A**
**Step 1: Converting spike variability into realtime variability surprisal**
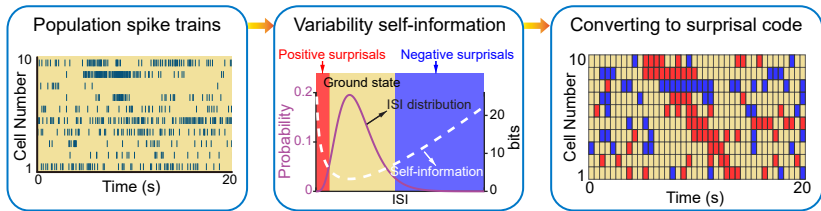
**B**
**Step 2: Uncovering joint surprisal patterns**
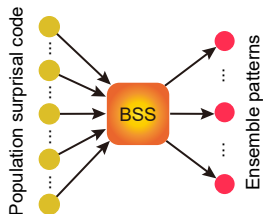
**C**
**Step 3: Identifying corresponding cell assemblies**
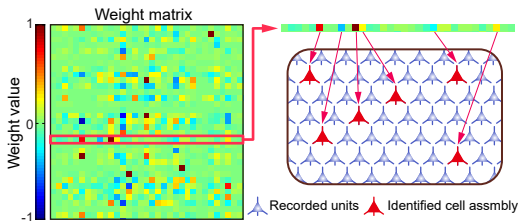

**Figure 3**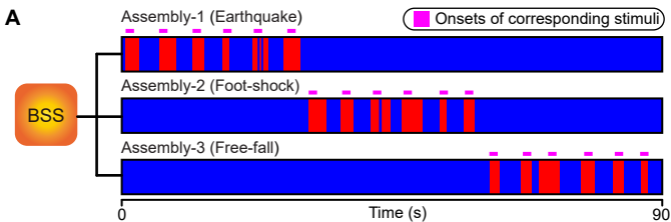**B** Assembly-1 (Earthquake)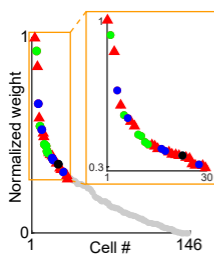

▲ Assembly-1 only      ● Assembly-1&2  
 ● Assembly-1&3      ● Assembly-1,2&3

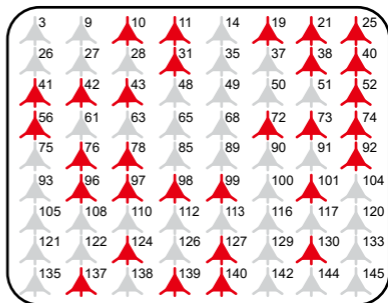**C** Assembly-2 (Foot-shock)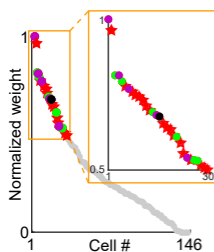

★ Assembly-2 only      ● Assembly-1&2  
 ● Assembly-2&3      ● Assembly-1,2&3

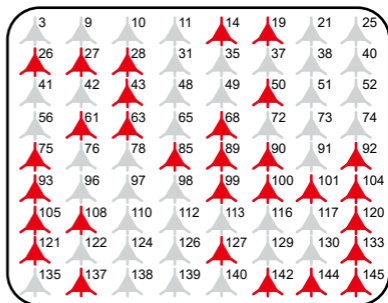**D** Assembly-3 (Free-fall)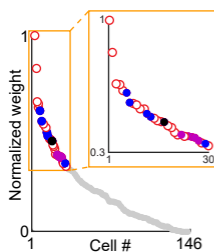

○ Assembly-3 only      ● Assembly-1&3  
 ● Assembly-2&3      ● Assembly-1,2&3

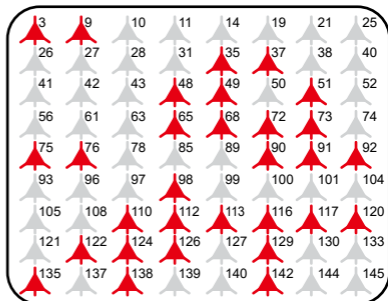

# Figure 4

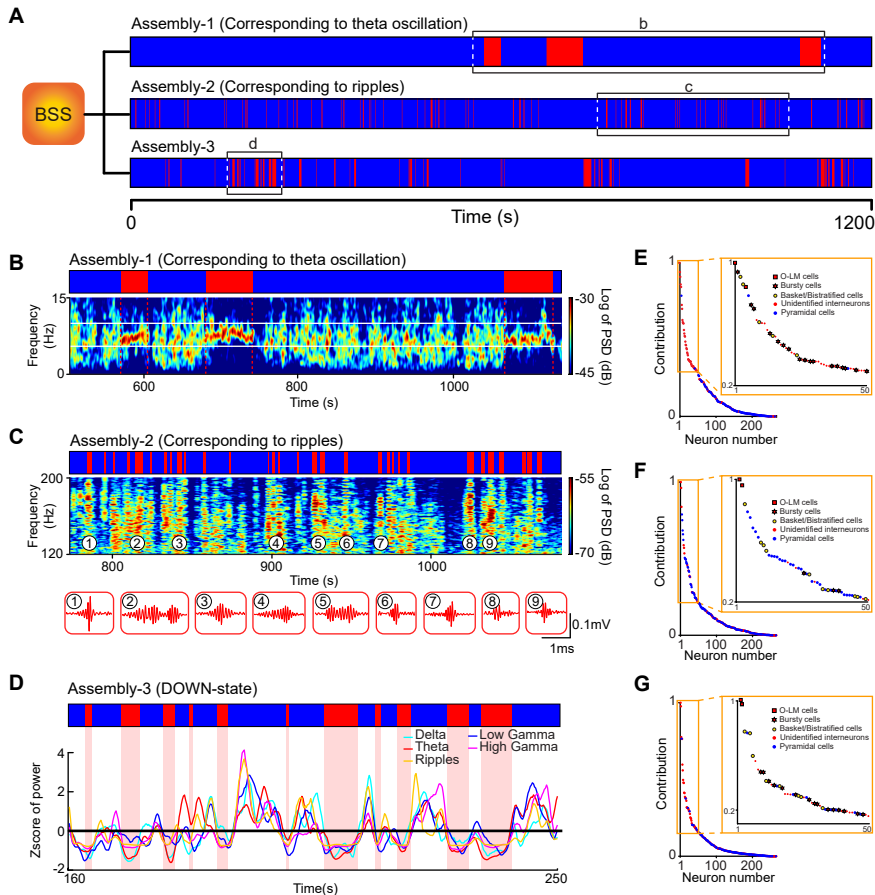

# Figure 5

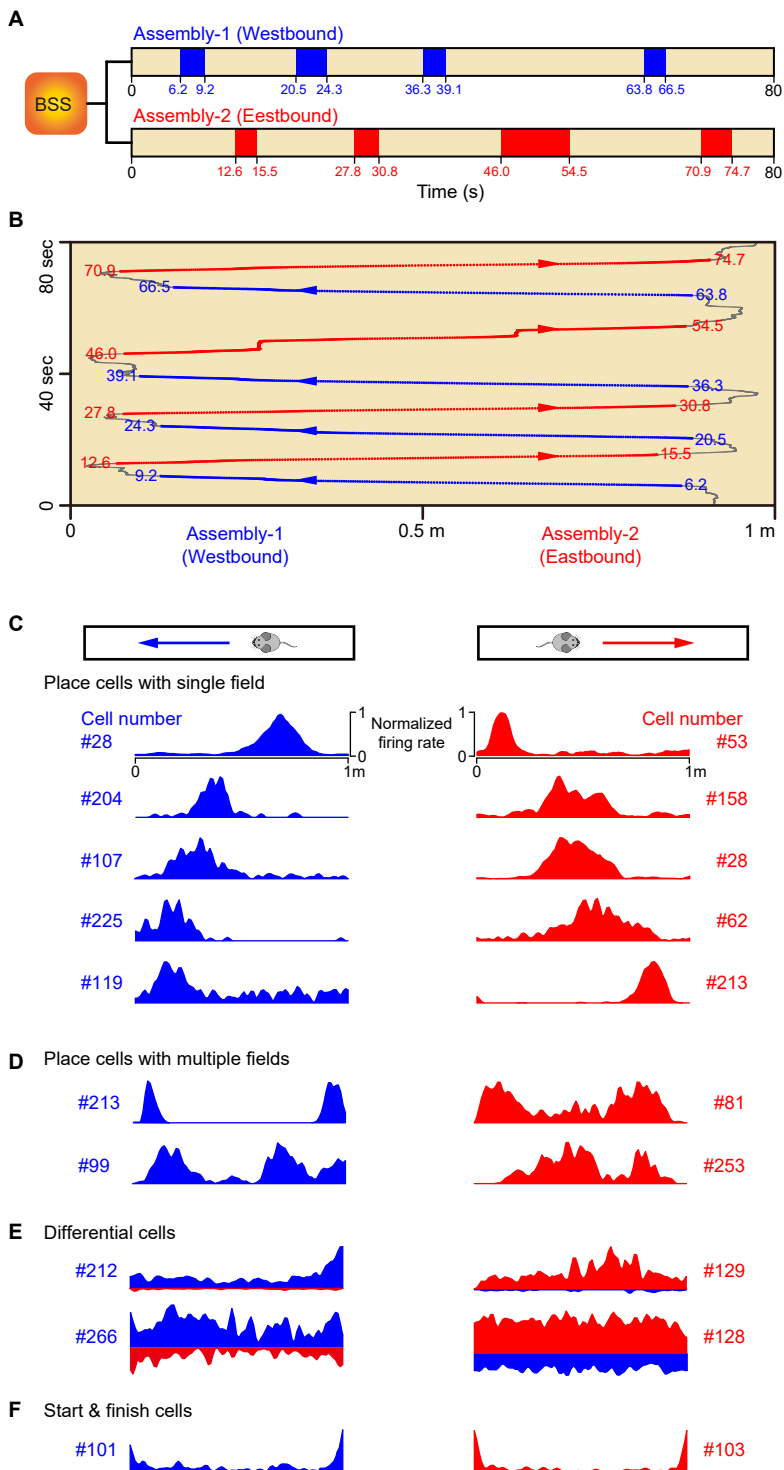



**Figure 6**

**A**

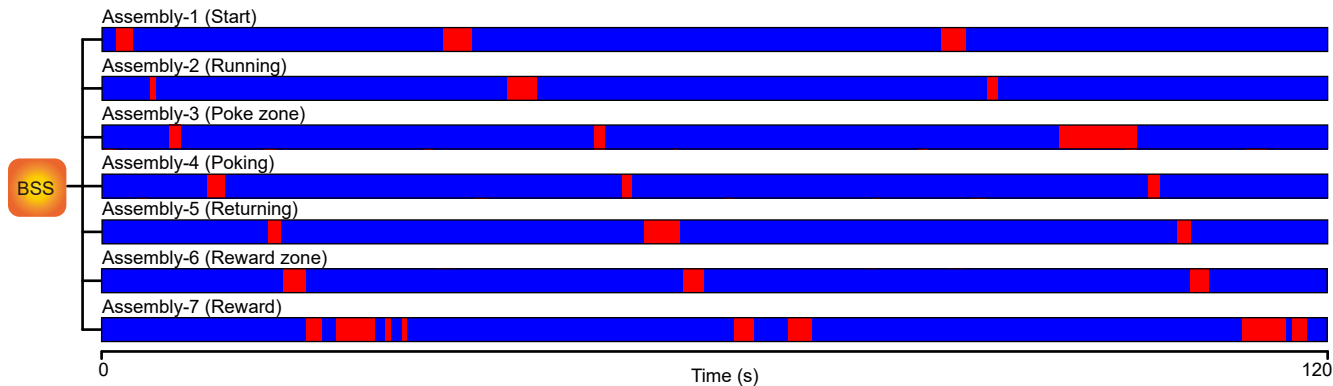

**B**

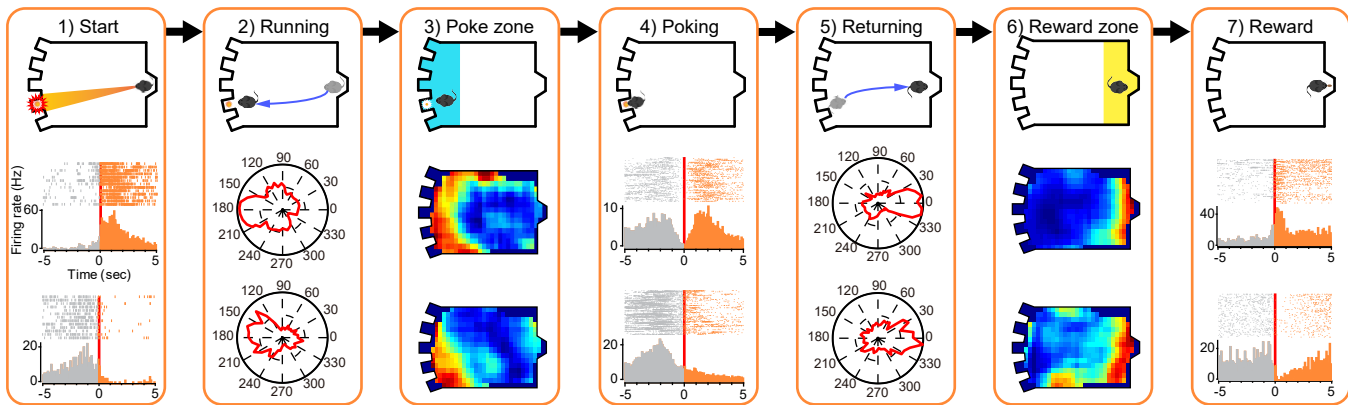

# Figure 7

## A

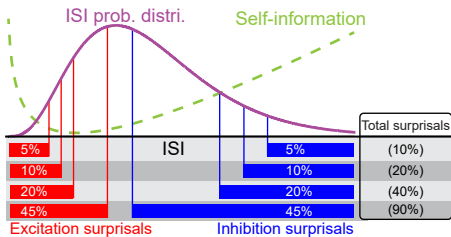

## B

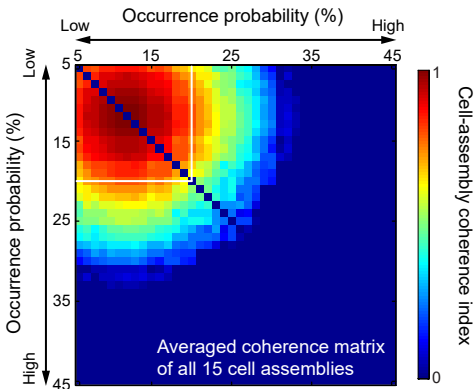

# Figure 8

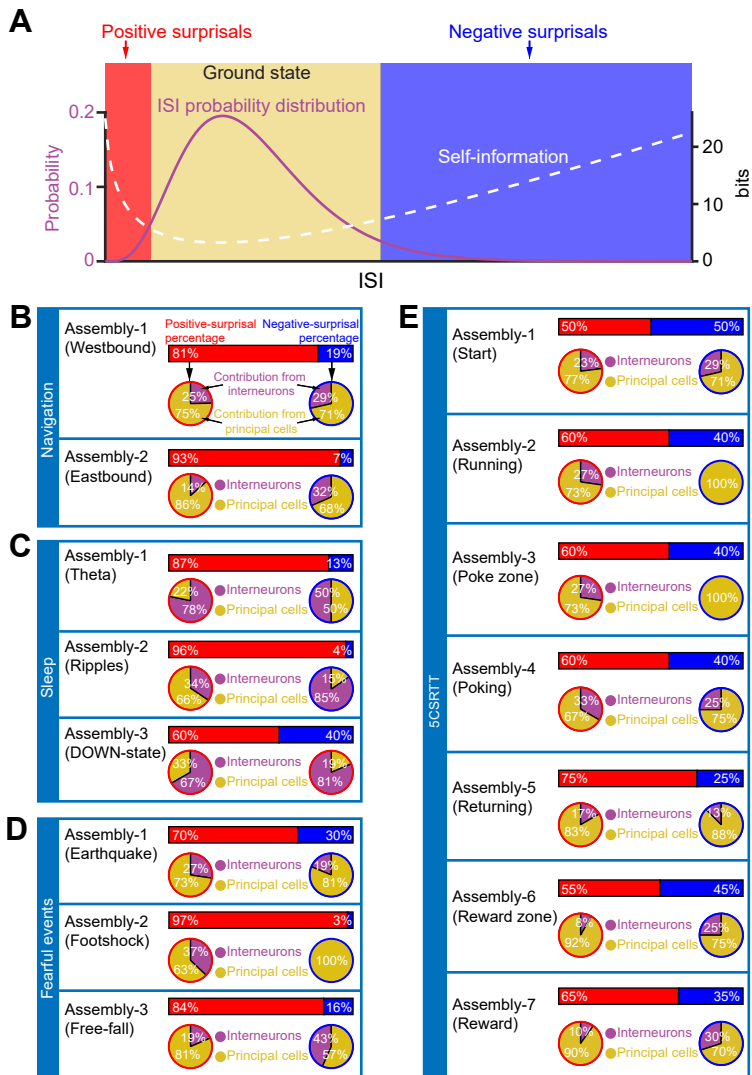

## Supplementary information

### Neural code uses self-information principle to organize the brain's universal cell-assembly coding

Meng Li<sup>1</sup>, Kun Xie<sup>1,2</sup>, Hui Kuang<sup>1</sup>, Jun Liu<sup>1</sup>, Deheng Wang<sup>1,2</sup>, Grace E. Fox<sup>1</sup>, Zhifeng Shi<sup>3</sup>, Liang Chen<sup>3</sup>, Fang Zhao<sup>1\*</sup>, Ying Mao<sup>3\*</sup>, & Joe Z. Tsien<sup>1\*</sup>

<sup>1</sup>Brain and Behavior Discovery Institute and Department of Neurology, Augusta University, Augusta, GA 30912, USA

<sup>2</sup>The Brain Decoding Center, Banna Biomedical Research Institute, Yunnan Province Academy of Science and Technology, Xi-Shuang-Ban-Na Prefecture, Yunnan, China

<sup>3</sup>Neuropathology, Huashan Hospital, Fudan University, Shanghai 200040, China

\*Correspondence should be addressed to Fang Zhao ([fzhao@augusta.edu](mailto:fzhao@augusta.edu)) and Joe Z. Tsien ([itsien@augusta.edu](mailto:itsien@augusta.edu))

Supplementary information includes SI Materials and Methods and SI figures S1-S10.

## SI Materials and Methods

### Ethics Statement

All animal work described in the study was carried out in accordance with the guidelines laid down by the National Institutes of Health in the United States, regarding the care and use of animals for experimental procedures, and was approved by the Institutional Animal Care and Use Committee of Augusta University (Approval AUP number: BR07-11-001).

### *In vivo* recording in mice and data processing

Tetrodes and headstages were constructed using the procedures as we have previously described (1, 2). To construct tetrodes, a folded piece consisting of four wires (90% platinum, 10% iridium, 13  $\mu\text{m}$ , California Fine Wire Company, Grover Beach, CA, USA) was twisted together using a manual turning device and soldered with a low-intensity heat source (variable temperature heat gun 8977020, Milwaukee, Brookfield, WI, USA) for 6 s. The impedances of the tetrodes were measured with an electrode impedance tester (Model IMP-1, Bak Electronics, Umatilla, FL, USA) to detect any faulty connections, and our tetrodes were typically between 0.7 M $\Omega$  and 1 M $\Omega$ . The insulation was removed by moving the tips of the free ends of the tetrodes over an open flame for approximately 3 s. The tetrodes were then placed into appropriate polyimide tubes. The recording ends of the tetrodes were cut differentially (Vannas spring scissors –3 mm cutting edge, Fine Science Tools, Foster City, CA, USA) according to the different depths of the recording sites. This ensures that only tetrodes, but not the surrounding polyimide tubes, were inserted into the brain tissue, thereby minimizing the tissue damage.

We employed adjustable 128-channel tetrode microdrives to target the basolateral amygdala (BLA; n = 8 WT mice), anterior cingulate cortex (ACC; n = 7 WT mice), the retrosplenial cortex (RSC; n = 20 WT mice), dorsal striatum (STR; n = 7 WT mice), and prelimbic region (PrL; n = 4 WT mice) bilaterally with 64

channels per hemisphere. Whereas the CA1 units were recorded from nine WT mice using the adjustable 96-channel recording array (with 48-channels bilaterally). Stereotaxic coordinates were as follows: for BLA, 1.7 mm posterior to bregma, 3.5 mm lateral, -4.0 mm ventral to the brain surface; for ACC, +0.5 mm AP, 0.5 mm ML, -1.75 mm DV; for CA1, 2.0 mm lateral to the bregma and 2.3 posteriors to the bregma; for RSC, -2.5 mm AP, 0.5 mm ML, -0.8 mm DV; for STR, +0.62 mm AP, 1.35 mm ML, -2.0 mm DV; and for PrL, +1.70 mm AP,  $\pm$  0.5 mm ML (3).

Male wild-type mice (6–8 months old) were moved from home cages housed in the LAS facility to the holding area next to the chronic recording rooms in the laboratory and stayed in a large plastic bucket (20 inches in diameter and 16 inches in height – per mouse, Walmart) with access to water and food for a week prior to surgery. During this period, the animals were also handled daily to minimize the potential stress from human interaction. The animal was given an intraperitoneal injection of 60 mg/kg ketamine (Bedford Laboratories, Bedford, OH, USA) and 4 mg/kg Domitor (Pfizer, New York, NY, USA) prior to the surgery. Animal's head was secured in a stereotaxic apparatus, and an ocular lubricant was used to cover the eyes. The hair above the surgery sites was removed, and Betadine solution was applied to the surface of the scalp. An incision was then made along the midline of the skull. Hydrogen peroxide (3% solution, Fisher Scientific) was placed onto the surface of the skull so that bregma could be visualized. The correct positions for implantation were then measured and marked. For fixing the microdrive headstage, four holes for screws (B002SG89S4, Amazon, Seattle, WA, USA) were drilled on the opposing side of the skull and, subsequently, the screws were placed in these holes with reference wires being secured to two of the head screws. Craniotomies for the tetrode arrays were then drilled, and the dura mater was carefully removed. After the electrodes were inserted and tetrodes were secured to the fiberglass base, the reference wires from the connector-pin arrays were soldered such that there would be a continuous circuit between the

ground wires from the head screws and those from the connector-pin arrays. Finally, the connector-pin arrays were coated with epoxy. Aluminum foil was used to surround the entire headstage to aid in protection and to reduce noise during recordings. The animals were then awoken with an injection of 2.5 mg/kg Antisedan. The animals were allowed to recover post-surgery for at least 3–5 days before recording. Then, the electrode bundles targeting the BLA, STR and hippocampal CA1 region were slowly advanced over several days in small daily increments. For the cortical sites, tetrodes were advanced usually only once or twice in a small increment. At the end of the experiments, the mice were anesthetized and a small amount of current was applied to the recording electrodes in order to mark the positions of the stereotrode bundles. The actual electrode positions were confirmed by histological Nissl staining using 1% cresyl echt violet. For facilitating the identification of electrode array position, the electrode tips were dipped in fluorescent Neuro-Dil (Neuro-Dil, #60016, Red oily solid color, from Biotium, Inc.) which then can reveal the electrode track.

Neuronal activities were recorded by MAP system (multi-channel acquisition processor system, Plexon Inc., Dallas, TX) in the manner as previously described (4). Extracellular action potentials and local field potentials data were recorded simultaneously and digitized at 40 kHz and 1 kHz respectively. The artifact waveforms were removed and the spike waveform minima were aligned using the Offline Sorter 2.0 software (Plexon Inc., Dallas, TX), which resulted in more tightly clustered waveforms in principal component space. Spike-sortings were done with the MClust 3.3 program with an auto-clustering method (KlustaKwik 1.5). Only units with clear boundaries and less than 0.5% of spike intervals within a 1 ms refractory period were selected. The stability of the in vivo recordings was judged by waveforms at the beginning, during, and after the experiments. Well-separated neurons were assessed by “Isolation Distance” and “Lratio” (5). Neurons whose “Isolation Distance” <15 and “L-ratio” >0.7 were excluded in

the present analyses.

### Analysis of ISI's variability

Three well-defined statistics were adopted to quantitatively describe the variability of the neuron's ISI - namely, the coefficient of variation ( $CV$ ), skewness and kurtosis. The definitions of these three variability measurements were as follow:

$$CV = \frac{\sigma}{\mu} \quad (1)$$

$$Skewness = E \left[ \left( \frac{I - \mu}{\sigma} \right)^3 \right] \quad (2)$$

$$Kurtosis = \frac{E \left[ (I - \mu)^4 \right]}{\left( E \left[ (I - \mu)^2 \right] \right)^2} \quad (3)$$

where  $I = (i_1, i_2, \dots, i_n)$  denotes ISI of a neuron,  $\sigma$  is the standard deviation of  $I$ , and  $\mu$  is the mean of  $I$ . As shown in [Figure 1B](#), BLA dataset has 496 putative principal cells from 8 mice, CA1: 495 putative principal cells from 9 mice, STR: 295 putative principal cells from 7 mice, RSC: 504 putative principal cells from 5 mice, PrL: 85 putative principal cells from 4 mice, ACC: 195 putative principal cells from 6 mice.

We also conducted the same analysis to two datasets recorded from BLA and hippocampal CA1 under two distinct states - namely awake state and anesthesia. Recordings were first carried out when animals were awake and immobile in their home cages. Minimum 40-minute neural activities were recorded for awake state analysis. To produce ketamine-induced anesthesia, the animals were injected with a 60 mg/kg ketamine and 0.5 mg/kg Domitor cocktail mixture via i.p., the animals lost the righting reflex in a few minutes. Neural spike activities were recorded for 50 minutes under anesthetized state. 40-minute neural spike data recorded from the fully anesthetized state starting from 10 minutes after the Ketamine/Domitor injections were selected for the present analysis. For neuronal variability analyses of awake state vs. anesthesia ([Figure 1C](#)), the CA1 dataset contains 59 putative principal cells from 3 mice,



and the BLA dataset has 92 putative principal cells from 2 mice.

### Variability-surprisal based cell assembly discovery (VCAD) framework

**1) Assessing ISI's variability.** In this step, a gamma distribution model was applied to describe the variability of the neuron's ISI (6). A gamma distribution model is defined by a shape parameter  $k > 0$  and a scale parameter  $\theta > 0$ , and the gamma probability density function for spike trains is defined by

$$P\{n \text{ spikes during } \Delta t\} = \left( \frac{1}{\theta^k \Gamma(k)} \right) \Delta t^{k-1} e^{-\frac{\Delta t}{\theta}} \quad (4)$$

where  $\Gamma(k)$  stands for the gamma function.

We fitted the gamma distribution model for the ISIs of each neuron. Shape parameter  $k$  and scale parameter  $\theta$  were estimated by the maximum likelihood estimates (MLE) method, which selected values of these two parameters that produced a gamma distribution for the ISIs with minimal errors. To avoid an under-sampled error due to too few data points, units with  $<250$  ISIs were excluded in the present analysis.

For each cell, two boundaries of the ground state were assigned base on the fitted gamma distribution. Using these two thresholds, the neural spike trains were converted to variability surprisals - that is, positive surprisals, negative surprisals and ground state. Specifically, we first binned the neural spike trains (bin size = 200ms for all analyses), and the ISI of the bin  $ISI_{bin}$  was set as follows:

$$ISI_{bin} = \frac{\sum_{i=1}^n ISI_i}{n} \quad (5)$$

where  $n$  is the total number of ISIs which occurred in the bin (including partly-occurred ISIs),  $ISI_i$  is the time duration of the  $i$ th ISI in the bin. The bins whose ISIs are less than the lower boundary of ground state were assigned as positive surprisals (red region in the middle subpanel of step 1 in Figure 2A, which means shorter ISIs and higher instant firing rates), bins whose ISIs are larger than the higher boundary of ground state were assigned as negative surprisals (blue region in the middle subpanel of step 1 in Figure

2A, corresponding to longer ISIs and lower instant firing rate), and all other bins were assigned as ground state. In this way, the neuron's spike train was converted into a surprisal code. In the present analysis, the boundaries of ground state were set as 10% and 90% based on the fitted gamma CDF curves - that is, the ISIs whose gamma CDF is less than 10% or higher than 90% were assigned as positive or negative surprisals, respectively.

**2) Uncovering joint surprisal patterns.** In this step, the blind source separation (BSS) method was applied to decode the ensemble patterns from the population surprisal code by searching joint variability-surprisals. Independent Component Analysis (ICA, a BSS technique) was adopted to unbiasedly uncover distinct ensemble patterns; that is, reducing high-dimensional data (population surprisal code) to a set of independent information sources corresponding to different brain states.

ICA is a statistical technique that aims at finding a separating or demixing matrix  $\mathbf{W}$  for generating linear projections of the input data that maximize their mutual independence. The ICA model assumes that the recorded neuronal population spike activities (represented by  $\mathbf{SA}(t) = [sa_1(t), sa_2(t), \dots, sa_n(t)]$ ) contain mixtures of the  $n$  underlying information sources (represented by  $\mathbf{IS}(t) = [is_1(t), is_2(t), \dots, is_n(t)]$ ), i.e.,

$$\mathbf{SA}(t) = \mathbf{A} \times \mathbf{IS}(t) \quad (6)$$

where the square matrix  $\mathbf{A}$  contains the mixture coefficients  $a_{ij}$ . The aim of ICA is to find a demixing matrix  $\mathbf{W}$  that is an approximation of the inverse of the original mixing matrix  $\mathbf{A}$  whose output

$$\hat{\mathbf{IS}}(t) = \mathbf{W} \times \mathbf{SA}(t) \quad (7)$$

is an estimate of  $\mathbf{IS}(t)$  containing the underlying information sources (ensemble patterns of corresponding cell assemblies). To uncover the independent information sources,  $\mathbf{W}$  must maximize the non-Gaussianity of each source. In practice, iterative methods are used to maximize or minimize a

given cost function that measures non-Gaussianity. ICA analyses were performed by FastICA Matlab package that implemented the fast fixed-point algorithm (7).

The major challenge of BSS analysis of neural population activities is how to select the optimum number of information sources that provide the best representation of distinct brain states. The nature of the reduced dimension  $p$  means that  $p$  information sources are extracted from neural population activities. Many subjective methods can be derived but ultimately the relevance of each ensemble pattern depends on the nature of data being analyzed.

Here we introduced a criterion for selecting the best relevant ensemble patterns. This criterion was based on the hypothesis that cell-assembly coding under a given cognitive state should be most efficiently achieved by using a minimal amount of energy consumption while producing a sufficient robustness in the population-encoding of information. That is to say, the assembly code should use the least amount of variability changes of individual cells together with the minimal numbers of such information-coding cells. Thus, for all possible  $p$ , we calculated the number of the coefficient of variation ( $CV$ ) of the numbers of large-contributed neurons (neurons whose weights in demixing matrix  $\mathbf{W}$  exceeded three times the standard deviation (S.D.) of all weights) over all channels. For example, supposing  $p=6$  which meant there were six ICs, and the numbers of large-contributed neurons in six ICs were  $\{6,8,11,7,7,5\}$ , the mean and S.D. of these numbers were 7.33 and 2.07, therefore the  $CV$  for  $p=6$  was 0.28 ( $2.07/7.33$ ). In this way, a vector  $\{CV_i\}$  was produced, where  $i$  covered all possible values of  $p$ . The dimension with  $\min(\{CV_i\})$  was unbiasedly selected as the best relevant dimension. An example is shown in Figure S3A,  $\{CV_i\}$  were calculated for a set of neural population activity with  $p$  from 2 to 20, and dimension 3 with  $\min(\{CV_i\})$  was chosen (highlighted by the red circle).

**3) Identifying corresponding cell assemblies.** For each decoded information source

(ensemble pattern), the members of the corresponding cell assembly were selected as top large-weight neurons, which can be directly identified by their weights in demixing matrix **W** of ICA analysis. It should be noted that cells' weights in **W** could be either positive or negative values; here, we used absolute values of cells' weights for the identification of corresponding cell assemblies.

### **Fearful events and corresponding data analysis**

Mice were subjected to three fearful episodic events, earthquakes, foot-shocks, and free-fall drops. For the earthquake-like shake, the mouse was placed in a small chamber (4" x 4" x 6"H circular chamber) fixed on top of a vortex mixer and shaken at 300 rpm for 400ms for six times with 1~3-minute time interval between each shake. For fearful foot-shock, the foot-shock chamber was a square chamber (10" x 10" x 15"H) with a 24-bar shock grid floor. The mouse was placed into the shock chamber for three minutes and received the foot-shock stimulus (a continuous 300-ms foot-shock at 0.75 mA) for a total of six times with inter-trial time interval between 1~3 minutes. For free-fall in the elevator, the animal was placed inside a small box (3" x 3" x 5"H) and dropped from a 13-cm height (a cushion which made from a crumpled table cloth was used to dampen the fall and to stop the bouncing effect). After 1~2 minutes, the elevator was raised gently back to the 13-cm height and dropped again after 1~2 minutes (this process was also repeated six times). These episodic stimuli are fearful as evidenced from physiological indications including a rapid increase in heart rates as well as reduced heart rate variability (8, 9). To maintain the consistency of stimulation timing (minimizing the possible prediction of upcoming stimuli), the stimuli were triggered by a computer and delivered at randomized intervals within 1-3 minutes. After the completion of all fearful event sessions, the mouse was placed back into the home cages.

### **Sleep and corresponding data analysis**

Data was recorded when the mouse was sleeping in the home cage. The recorded local field

potentials (LFP) were first processed by the FPAAlign (a utility program provided by Plexon Inc.) to correct the filter induced phase delays. LFP channels recorded in pyramidal cell layer were selected by judging the maximum yield of ripple during animal slow-wave sleep (SWS), and comparing the coherence in the theta-frequency and gamma-frequency band (10). Further analyses were carried out with these LFP data off-line by custom-written MATLAB (Mathworks) programs. The local field potential was band passed at Delta (2-4 Hz), Theta (4-10 Hz), low Gamma (25-90 Hz), fast Gamma (90-130 Hz) and hippocampal ripples (130-200 Hz) by hamming window based FIR filters with order of 30.

For extraction of ripple events, the root mean square power of the 130-200 Hz filtered LFP was calculated by sliding 10-ms window every one millisecond and averaged across electrodes. A threshold was set to five standard deviations above the mean power to detect ripples. The beginning and the end of oscillatory epochs were marked at points with the power reduced to two standard deviations above background mean. Periods of 20-ms or more were designated ripple episodes. The minimum point during each episode was regarded as the reference to calculate the peri-event histogram for each individual unit. If there are at least 3 bins during -30ms to 30ms (bin size: 10ms) greater than two standard deviations above the mean (the -500ms to -100ms and 100ms to 500ms epochs were used as a baseline), then this unit was considered having significantly elevated firing rate during ripple episodes.

For detection of theta epochs, the theta/delta power ratio was calculated in a 2s window. More than consecutive 15s periods in which the ratio was greater than 4 were identified, then the beginnings and ends of epochs were judged manually. To calculate the phase relationship between unit activity and theta oscillation, the LFP data was first digitally band-pass filtered (4-12 Hz). The troughs for each cycle were identified and were assigned instantaneous phase of 0 radians. The phase value of each spike was obtained by linear interpolation. Then the histogram was calculated with 20-degree bin size, and a

Rayleigh's circular statistics was performed to determine the significance of phase modulation of theta oscillations.

### **Linear track and corresponding data analysis**

A linear track experiment used a 100cm×10cm closed runway. The exploration duration was 20 minutes. Real-time positions of the mouse were tracked by CinePlex Behavioral Research Systems (Plexon Inc., Dallas, TX) automatically.

For each recorded unit, a corresponding 100×1 array of time-averaged firing rates was generated by dividing, on a pixel-by-pixel basis (1cm×10cm), the number of spikes by the time in each location. For place cell (including place cells with single or multiple fields) and differential cell analysis, a motion speed threshold was applied to generate the time-averaged firing rates arrays (i.e., the spikes were excluded if collected from an animal moving at speeds of less than 2.5 cm/s). Place fields were defined as a set of ≥5 contiguous pixels with a firing rate above two standard deviations of the mean firing rate. For start/finish cell analysis, no speed limit applied, and significant firings at two ends of the line track were defined as a set of ≥5 contiguous pixels with a firing rate above two standard deviations of the mean firing rate. All spatial firing plots shown in [Figure 3](#) were smoothed with 5×1 Gaussian smoothing filter using the Matlab software.

### **Five-choice visual discrimination operant-conditioning task and corresponding data analysis**

The animal was introduced to a custom-designed test chamber equipped with five response apertures that can illuminate, and a food magazine to deliver reward (Med Associates, Inc., VT. Product numbers: DIG-703B-USB, ENV-203-20, ENV-115C, ENV-312, SG-716B, ENV-307W, and ENV-312-2W). On the front wall of the chamber were five holes equipped with infrared (IR) detectors. IR photo beams were also presented inside the food magazine fitted on the opposite wall, where the house light was located.

The floor of the chamber consisted of stainless steel rods, and there was a removable tray at the bottom.

The pellet dispenser was located outside of the box and automatically delivered food pellet to the magazine through a plastic tube. Nose-poking responses were detected by a sensitive infrared detector placed 1/4" in from the front edge of each unit. The reward pellets were delivered automatically when the correct nose-poking responses were detected. All experimental procedures were controlled by Five Choice Serial Reaction Time Task Utility (Med Associates, Inc., VT).

A trial was initiated by the mouse entering the food magazine. A brief light-stimulus was then presented in one of five possible apertures after a 5-s inter-trial interval (ITI) had elapsed. The mouse was required to scan the five apertures for the appearance of the light-stimulus and to respond in the "correct" aperture with a nose-poke response in order to earn a single food pellet delivered in the food magazine. If the mouse responded before the stimulus ("premature response") or in an adjacent, incorrect aperture ("incorrect response"), a 5-s time-out (TO) period was introduced by extinguishing the house light and not providing a food reward. Failure to respond within the limited hold (LH) period resulted in an "omission" and a subsequent 5-s TO period. After collecting the reward or - on punished trials - at the end of the TO period, a head entry in the food magazine would start a new trial.

The mouse was pre-trained to achieve  $\geq 50$  correct trials within 30 minutes with  $>80\%$  accuracy and  $<20\%$  omissions. After pre-training, 20-minute neural activity was recorded from prefrontal cortex (specifically, prelimbic cortex) during 5CSRTT. During recording, the correct responses were made within  $5.81 \pm 0.71$ s and reward food pellets were collected within  $4.54 \pm 0.29$ s after correct nose-pokings. Animal's movements were recorded by CinePlex Behavioral Research Systems (Plexon Inc., Dallas, TX), and the animal's locations and head directions were tracked manually afterward.

For each neuron, a corresponding  $40 \times 25$  array of time-averaged firing rates was generated by

dividing, on a pixel-by-pixel basis (1 cm×1 cm), the number of spikes by the time in each location (the spikes were excluded if collected from animal moving at speeds less than 2.5 cm/s). Spatial-specificity firing patterns were defined as a set of  $\geq 9$  contiguous pixels with a firing rate above two standard deviations of the mean firing rate. The Spatial-specificity firing maps shown in [Figure 6](#) were smoothed with 6×6 Gaussian smoothing filter using the Matlab software.

We also calculated an orientation-firing polar histogram for each unit. The orientation-firing polar histograms were generated by dividing the number of spikes fired when the mouse faced a particular direction (in bins of  $10^\circ$ ) by the total amount of time the mouse spent facing that direction in the task chamber. No smoothing was applied to the resulting circular distribution. Rayleigh's circular statistics was applied to determine the significance of directional tuning of units.

### **Cell-assembly coherence index**

In the present analyses, we set the boundaries of ground state as 10% and 90% of the CDF of the skewed distribution model to uncover cell assemblies, and the decoded cell assemblies verified the effectiveness of these two boundaries. However, can robust cell-assembly decoding results be achieved with other settings of boundaries? To explore these questions, we examined the cell-assembly coherence index between decoded ensemble patterns under different boundaries of the ground state.

Specifically, we systemically varied lower boundaries from 5% to 45% with step by 1%, the corresponding higher boundaries were set as one minus the value of lower boundaries accordingly (from 95% to 55%, as shown in [Figure 7A](#)). Taking demixing matrix  $\mathbf{W}$  generated by boundaries of 10% and 90% as a standard decoder, a set of ensemble patterns was then generated with different boundaries for each cell assembly. We then calculated the Pearson correlation coefficients between these ensemble patterns corresponding to same state/stimuli. The Pearson correlation coefficient  $\rho(EP_A, EP_B)$



between ensemble pattern  $EP_A$  and ensemble pattern  $EP_B$  is defined as:

$$\rho(EP_A, EP_B) = \frac{\text{cov}(EP_A, EP_B)}{\sigma_A \sigma_B} \quad (6)$$

where  $\text{cov}(EP_A, EP_B)$  is the covariance of  $EP_A$  and  $EP_B$ ,  $\sigma_A$  and  $\sigma_B$  are the standard deviation of  $EP_A$  and  $EP_B$ , respectively. The cell-assembly coherence matrix of each cell assembly is generated by normalizing all corresponding correlation coefficients into range of 0 to 1.

### **Test of statistical significance**

In the present study, one-way ANOVA analysis and Tukey post hoc tests were conducted for the comparisons of multiple means. Student's t-test was used to assess whether two sets of data were significantly different from each other. In all figures that contained statistical significant test results, one asterisk denoted that the **P** value is in the range of 0.05-0.01, two asterisks denoted that the **P** value is in the range of 0.01-0.001, three asterisks denoted the **P** value is less than 0.001. Data were represented as mean  $\pm$  S.E.M.

## Figure S1

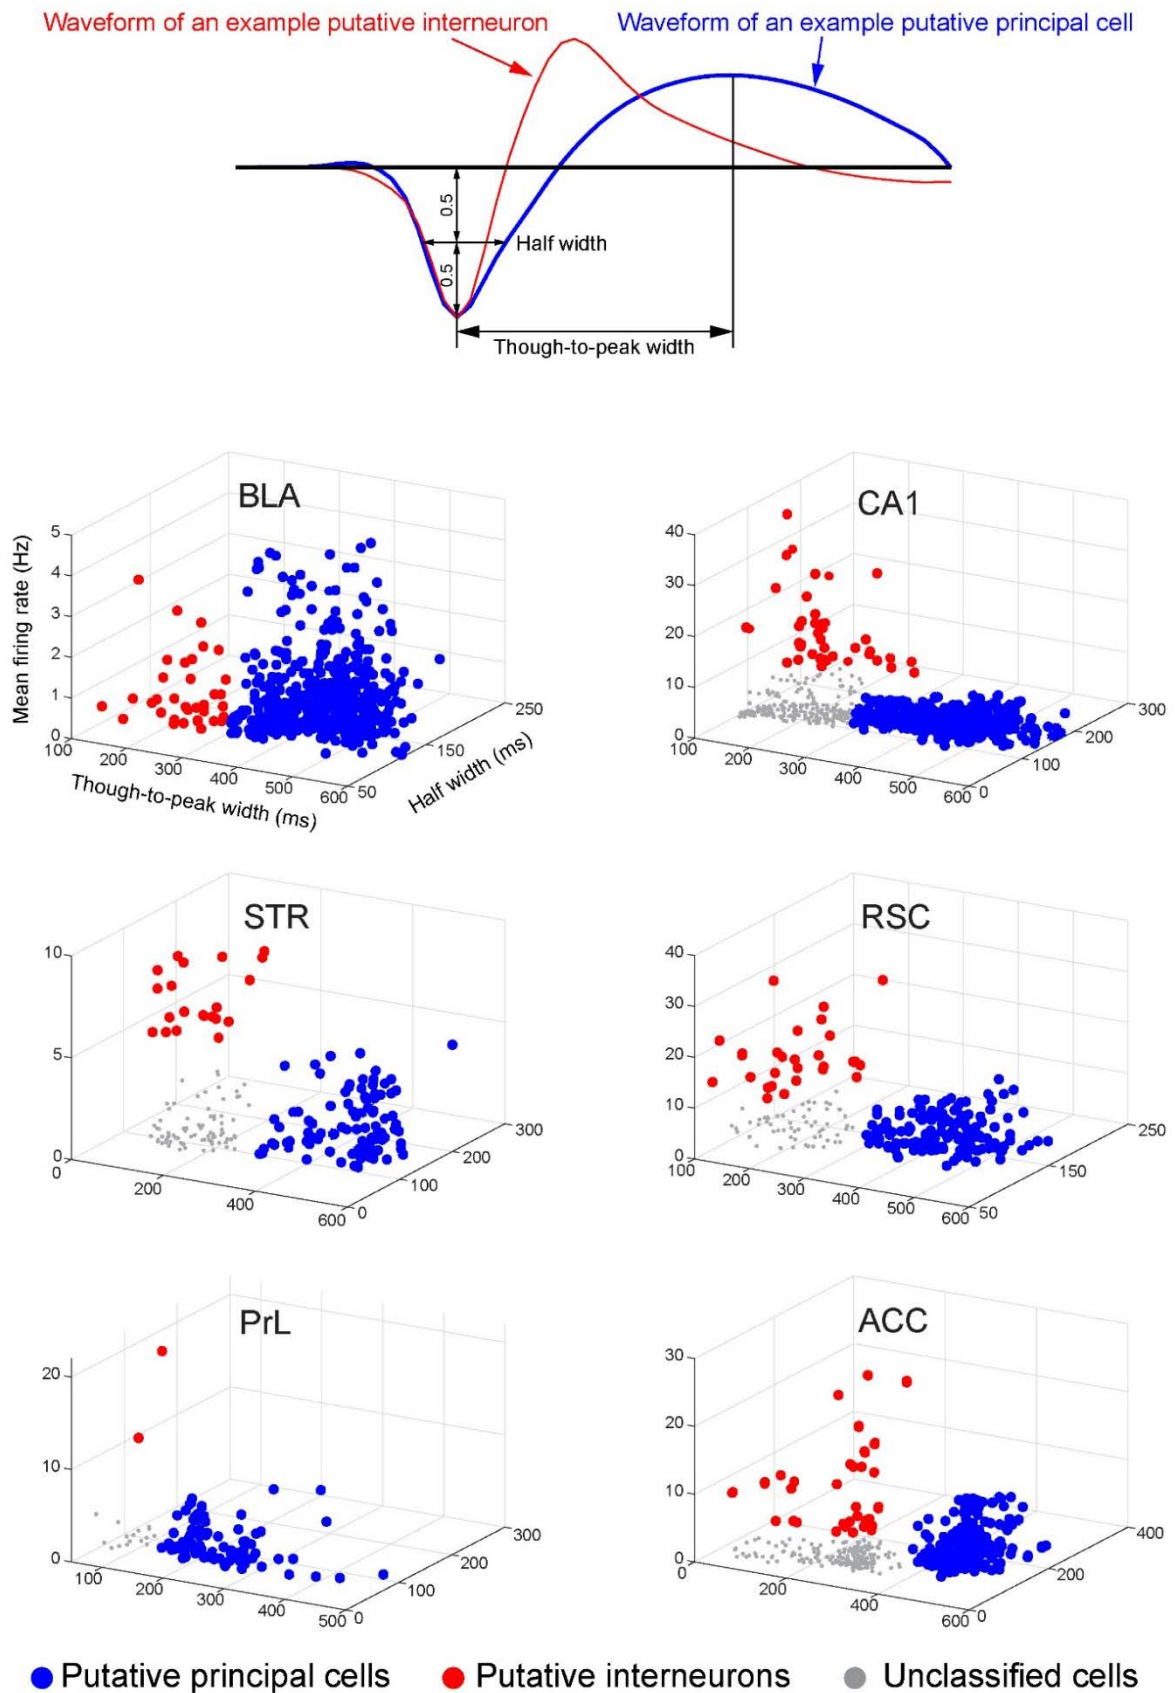

**Figure S1. Classification of putative principal cells and interneurons in 6 different brain regions.**

Isolated units are classified as putative excitatory principal cells or interneurons based on their characteristic firing activity including spike waveforms and firing rates. In general, putative principal cells fire at lower rates and have broader waveforms, whereas, interneurons have higher rates and relatively narrower waveforms. Numbers of putative principal cells: for BLA, 496 principal cells out of 601 recorded units; for CA1, 495 principal cells out of 713 recorded units; for STR, 295 principal cells out of 359 recorded units; for RSC, 504 principal cells out of 651 recorded units; for PrL, 85 principal cells out of 119 recorded units; and for ACC, 195 principal cells out of 397 recorded units.

## Figure S2

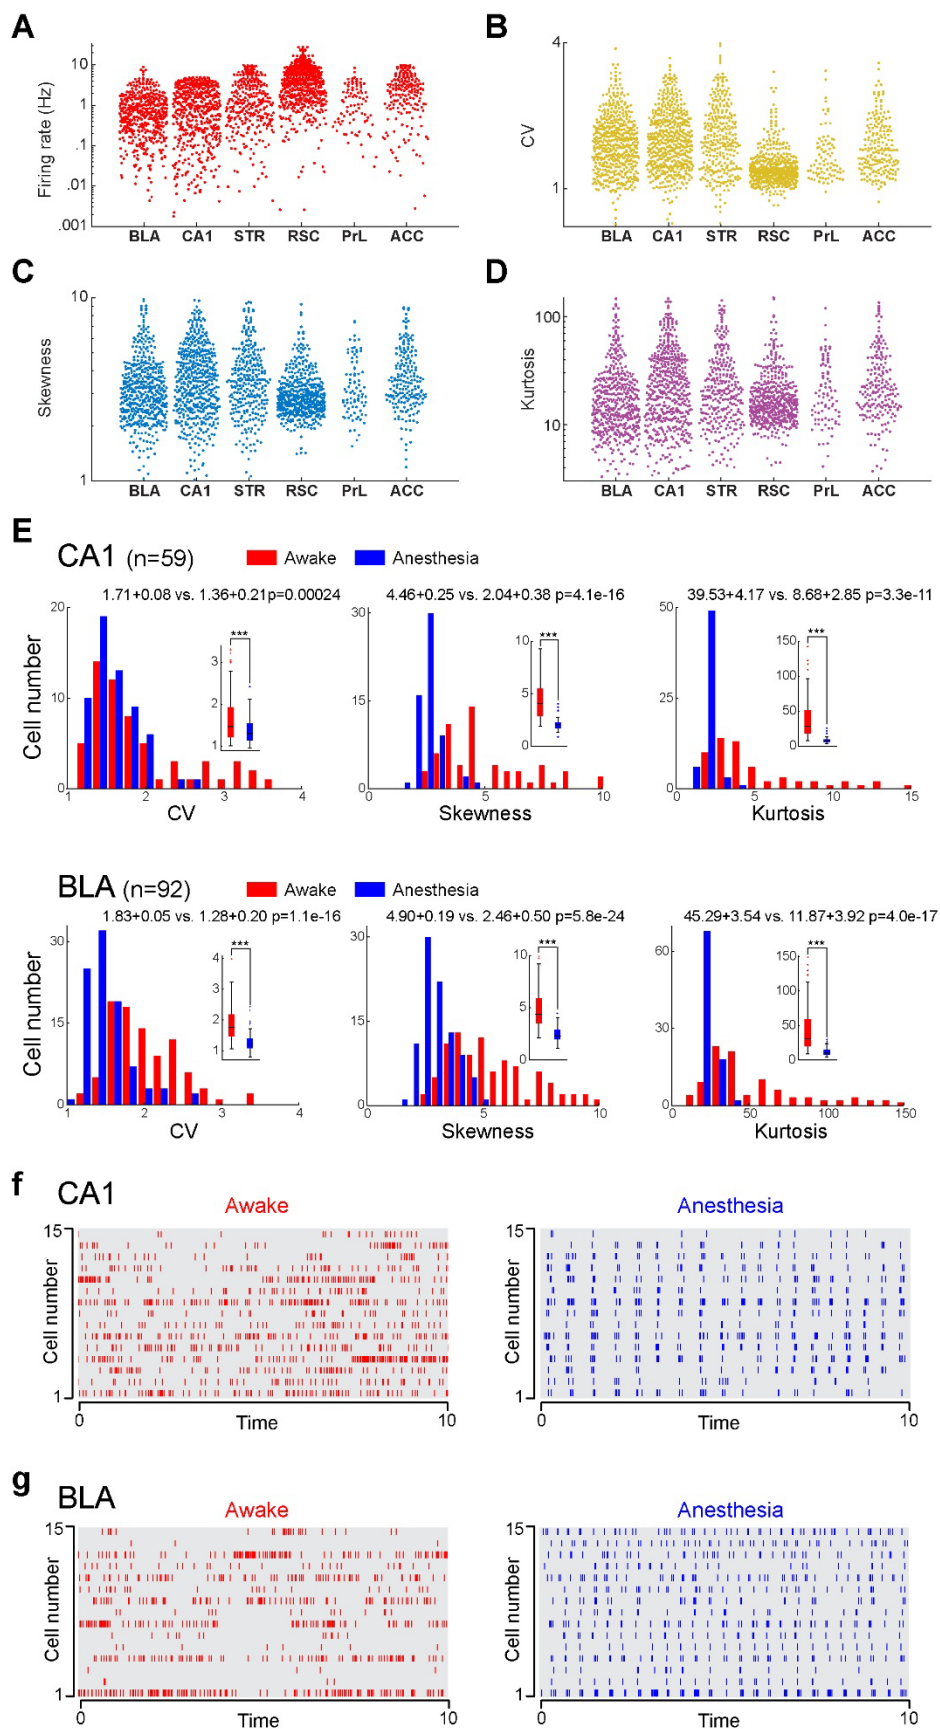

**Figure S2. Neural variability analysis across different regions.**

(A) Distributions of firing rates of principal neurons in six brain regions.

(B) Distributions of CV of principal neurons in six brain regions.

(C) Distributions of Skewness of principal neurons in six brain regions.

(D) Distributions of Kurtosis of principal neurons in six brain regions. All data shown in A-D is in logarithmic coordinates. It should be noted that the CV, Skewness, and Kurtosis in all these six brain regions show Gaussian-like distributions under logarithmic coordinates, indicating that the “long-tailedness” of the ISI distributions also follow skewed statistics.

(E) Shown are the histograms of CV, Skewness, and Kurtosis of ISI of putative principal cells in BLA and CA1 under two states - namely, awake state and ketamine-induced anesthesia. Compared with awake state, all these three statistics decrease significantly under anesthesia in both brain regions.

(F) Spike activities of 15 CA1 cells during awake state and anesthesia.

(G) Spike activities of 15 BLA cells during awake state and anesthesia.

## Figure S3

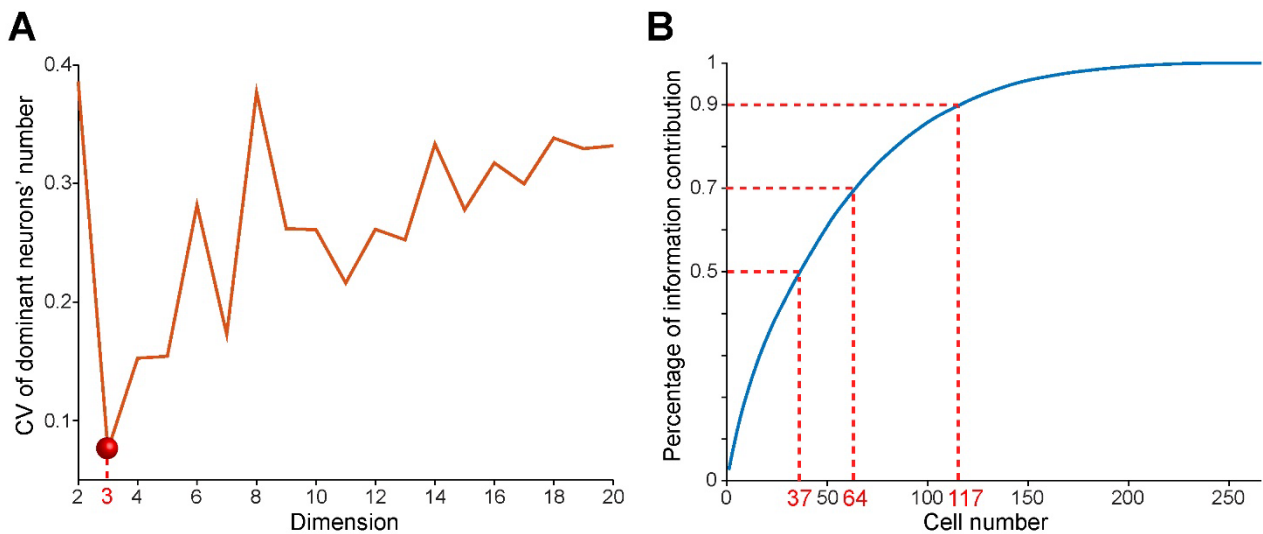

### Figure S3. Selecting the best dimension and discovering cell assemblies.

(A) Shown is an example of selecting the optimum dimension of ensemble patterns (sleep dataset).  $\{CV_i\}$  of the number of large-contributed neurons are calculated for dimensions from 2 to 20, dimension 3 (highlighted by the red circle) with a minimum  $CV$  is selected as the best relevant dimension.

(B) The blue curve shows the relationship between the number of neurons (x-axis) and their percentage of summing weights in the whole neural circuit (y-axis). 37 neurons (13.9% of total 266 neurons) contribute 50% information of corresponding ensemble pattern, 64 neurons (24.1%) contain 70% information contribution, while 90% of the information is contributed by 117 neurons (44.0%).

## Figure S4

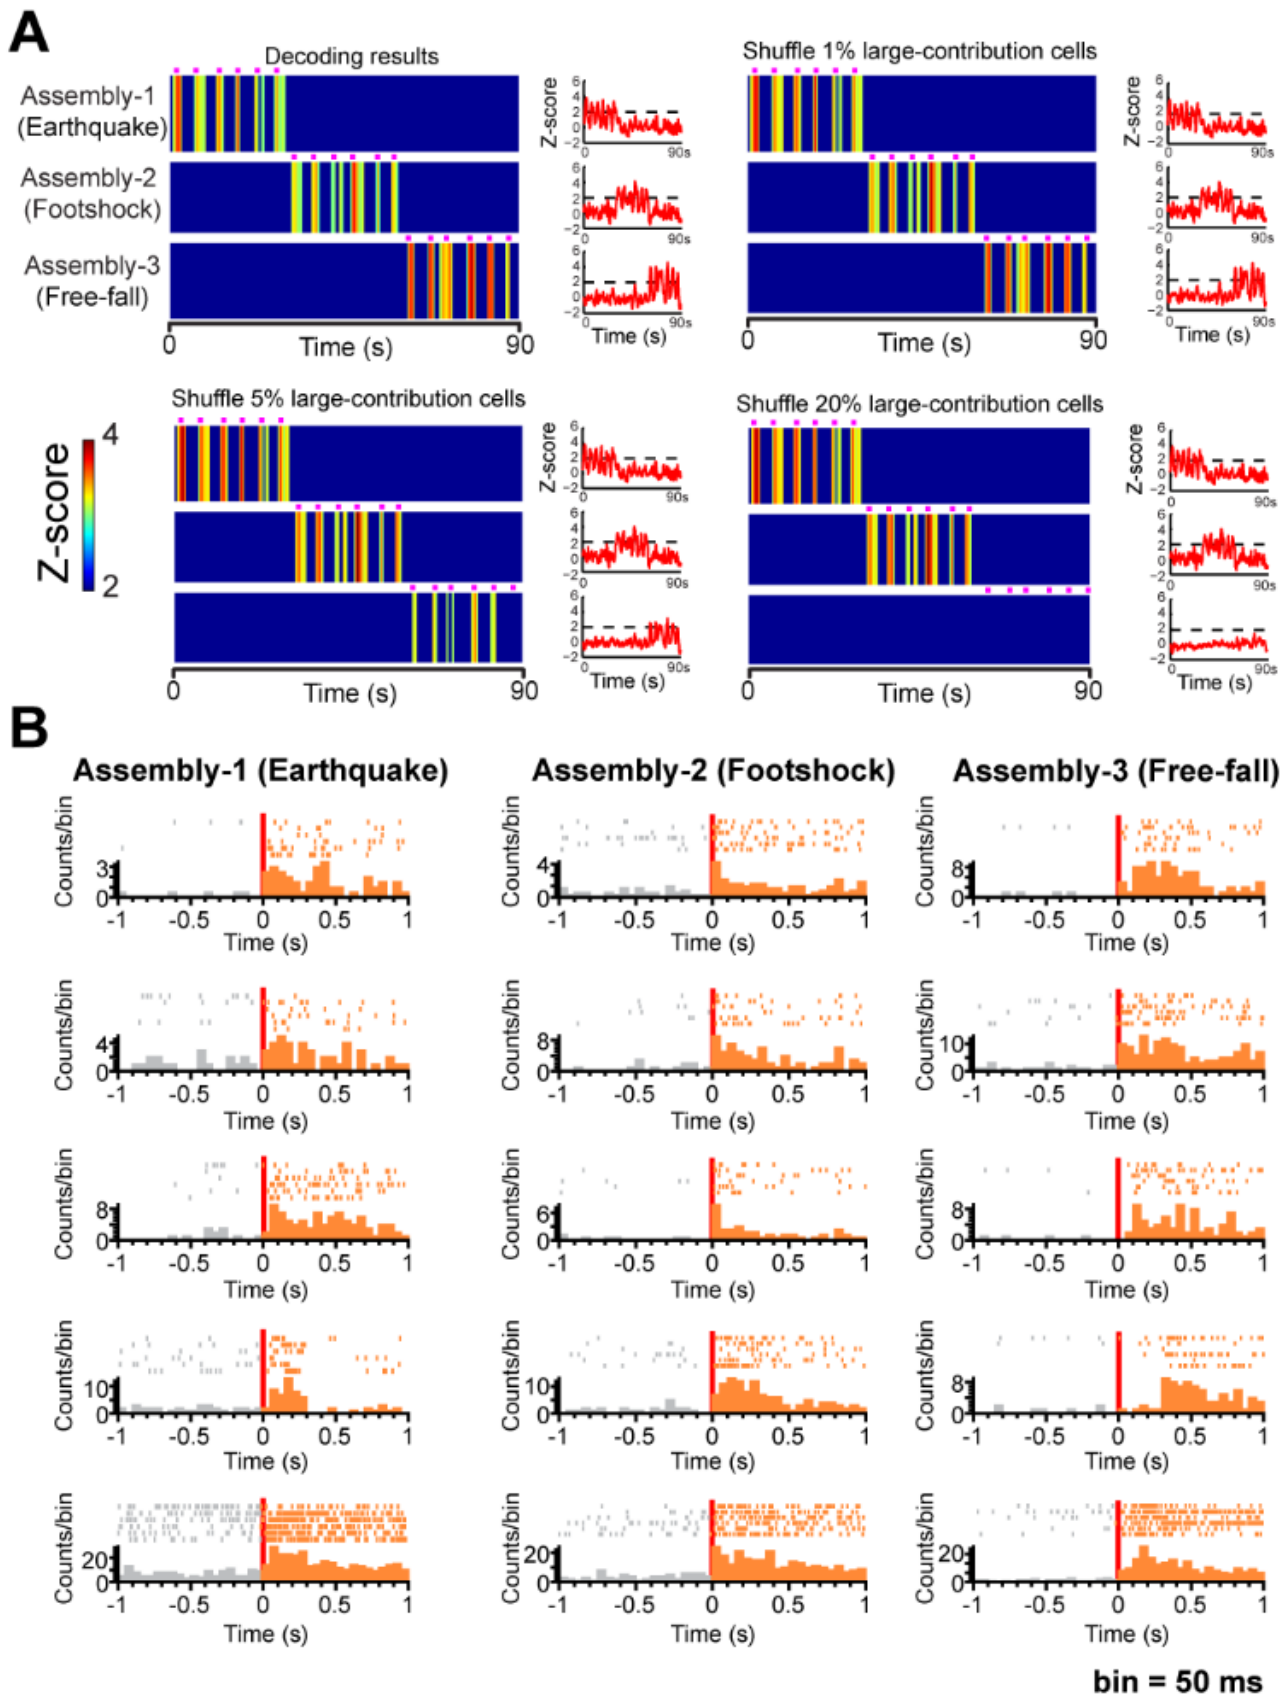

**Figure S4. Verification of decoded cell assemblies by shuffling top-weight neurons and responsiveness of cell assemblies encoding three fearful experiences.**

(A) We shuffled top large-weight neurons by replacing their firing pattern with Gaussian noise with the same mean firing rate and standard deviation. We observed that the ensemble pattern of Assembly-2 (corresponding to Footshock) gradually becomes weaker as more top contributed neurons are shuffled, while leaving other two ensemble patterns representing the Earthquake or Free-fall unchanged (Six trials per event, as shown by six purple bars above each ensemble pattern). Ensemble pattern of Assembly-2 finally disappears when top 20% contributed cells are shuffled.

(B) From left to right, each column shows peri-event rasters/histograms of five cell members of each cell assembly in response to the corresponding fearful episodic stimulus.



## Figure S5

### A

Shuffle 1% large contribution units in Assembly-1 (Theta)

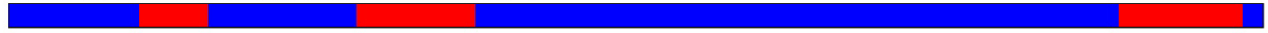

Shuffle 5% large contribution units in Assembly-1 (Theta)

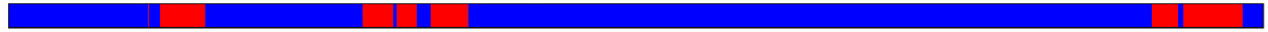

Shuffle 10% large contribution units in Assembly-1 (Theta)

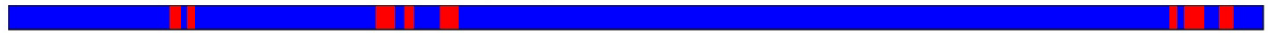

Shuffle 15% large contribution units in Assembly-1 (Theta)

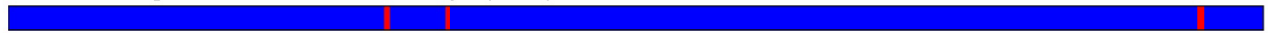

Shuffle 20% large contribution units in Assembly-1 (Theta)

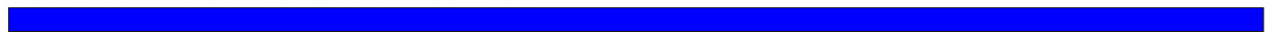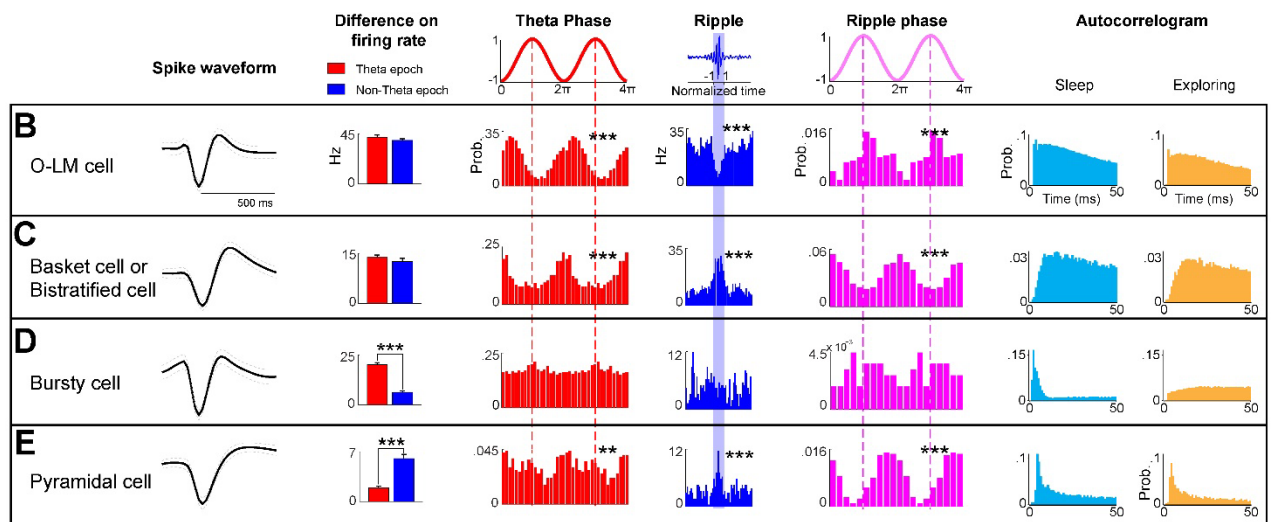

## **Figure S5. Verification of decoded cell assemblies by shuffling top-weight neurons and cell-type analysis.**

(A) Top-weight neurons were shuffled by replacing their firing pattern with Gaussian noise with the same mean firing rate and standard deviation. The ensemble pattern of Assembly-1 (corresponding to Theta oscillation) abate gradually when top contributed cells are shuffled. Furthermore, the ensemble pattern of Assembly-1 disappears when top 20% contributed cells are shuffled.

(B-E) Firing properties of different cell types in cell assemblies related to sleep oscillations. Shown are examples of four putative cell types [O-LM cell (B), Basket/Bistratified cell (C), Bursty cell (D) and pyramidal cell (E)] identified based on their distinct firing properties. The 1st left subpanels of B-E show the average waveforms of representative units of four cell types. The 2nd left subpanels of B-E are the firing rate differences between Theta and non-Theta epoch. The 3rd left subpanels of B-E show their theta phase-coupling properties, and 4th and 5th subpanels of B-E are the firing properties and phase-coupling properties at ripple occurrences. The right two subpanels of B-E are auto-correlograms of spike activities during sleep and exploring states. Note the peaks within 10 ms in the auto-correlogram plots indicate burst firing. These four cell types show distinct firing properties. Specifically, O-LM cells (B) exhibit inhibited firing upon ripple occurrences, which is a peculiar feature among all these cell types. Basket/Bistratified cells (C) exhibit high firing rates upon ripples, these cells show strongly coupled spike timing of with Theta oscillations and ripples ( $P < 0.001$ , Rayleigh's test), and these cells fire at the troughs of Theta oscillations and ripples. The distinguishing features of Bursty cells (D) are twofold: significant higher firing rates within Theta epochs and bursty firing during sleep. Pyramidal cells (E) have wider spike waveforms and high probabilities of burst firing. Here, the firing rate differences are examined by  $t$ -test, and Rayleigh's test is applied to phase-coupling properties of Theta oscillation and ripples. Two asterisks denote that  $P$ -value is in the range of 0.01-0.001, three asterisks denote  $P < 0.001$ .

## Figure S6

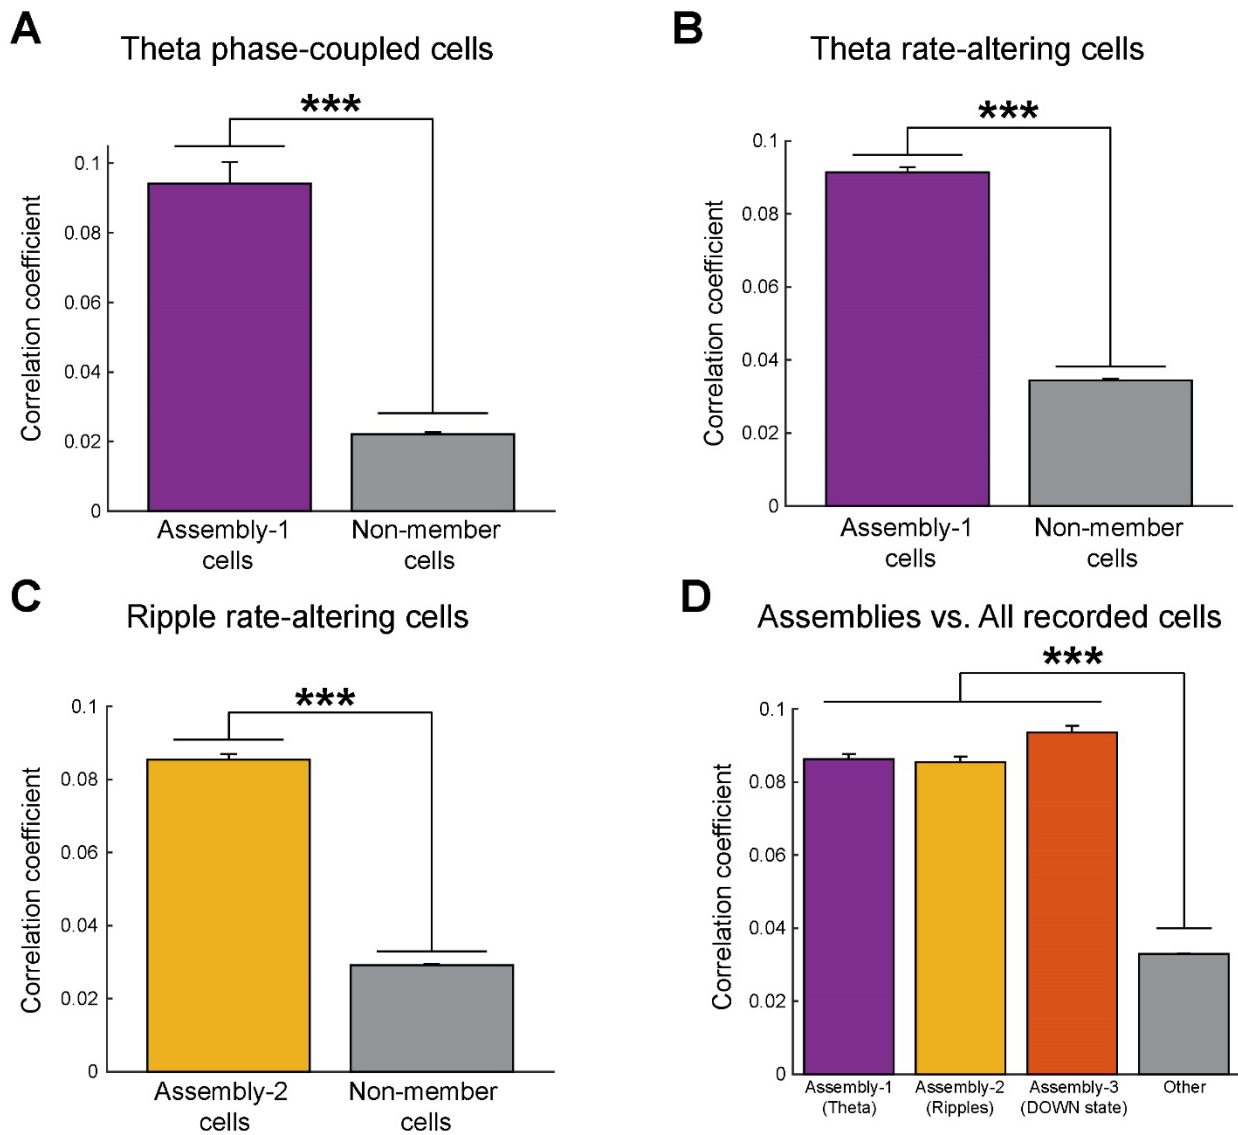

## Figure S6. Correlation analysis further verified the cell assemblies related to sleep oscillations.

We carry out correlation analysis on three cell assemblies corresponding to different sleep oscillations as well as other units. The neural data from the individual unit is first converted into a spike occurrence vector with a 200-ms bin size. We calculate Pearson's correlation coefficients between the occurrence vectors of all simultaneously recorded neurons during animal sleeping.

Correlation analysis is performed using the following formula:

$$C_{ij} = \frac{E[(f_i(t) - \mu_i)(f_j(t) - \mu_j)]}{\sigma_i \sigma_j}$$

Where  $f_i(t)$  and  $f_j(t)$  are the two spike occurrence vectors converted from neural data of unit  $i$  and unit  $j$  simultaneously recorded from the same animal; and  $\mu_i$  and  $\mu_j$  are the mean values of these two vectors respectively,  $\sigma_i$  and  $\sigma_j$  are standard deviations.

(A) There are 52 neurons show significant phase-coupling to Theta oscillation (Rayleigh's circular statistics,  $p < 0.001$ ). Among these 52 neurons, 9 neurons are cell members of Assembly-1 (Theta), other 43 neurons aren't. We calculate the correlations within these member and non-member theta phase-coupling cells, and observe that the correlations within Assembly-1 theta phase-coupling cells are significantly higher than the correlations within non-member theta phase-coupling cells (t-test:  $p < 0.001$ .  $0.0942 \pm 0.0062$  vs.  $0.0221 \pm 0.0006$ , data shown as mean  $\pm$  SE).

(B) There are 150 cells exhibit a significant difference in averaged firing rates between theta epochs vs. non-theta epochs (t-test:  $p < 0.001$ ). 48 of these Theta rate-altering cells are cell members of Assembly-1 (Theta), and 102 cells aren't. We observe that the correlations within Assembly-1 theta rate-altering cells are significantly higher than the correlations within non-member theta rate-altering cells (t-test:  $p < 0.001$ .  $0.0913 \pm 0.0014$  vs.  $0.0344 \pm 0.0004$ ).

(C) There are 239 cells exhibit significant firing rate changes during ripples (t-test:  $p < 0.001$ ). 53 of these ripple cells are the members of Assembly-2 (Ripples). The correlations within Assembly-2 cells are significantly higher than the correlations within non-member ripple cells (t-test:  $p < 0.001$ .  $0.0854 \pm 0.0015$  vs.  $0.0292 \pm 0.0002$ ).

(D) Correlations within three cell assemblies (53 neurons in each cell assembly (top 20% of 266 neurons)) are significantly higher than correlations within the neural population (all 266 neurons) (one-way ANOVA with post-hoc test. Assembly-1:  $0.0863 \pm 0.0014$ , Assembly-2:  $0.0854 \pm 0.0015$ , Assembly-3:  $0.0936 \pm 0.0018$ , All:  $0.0329 \pm 0.0002$ ).

**Figure S7**

**A** Assembly-1 (Theta)

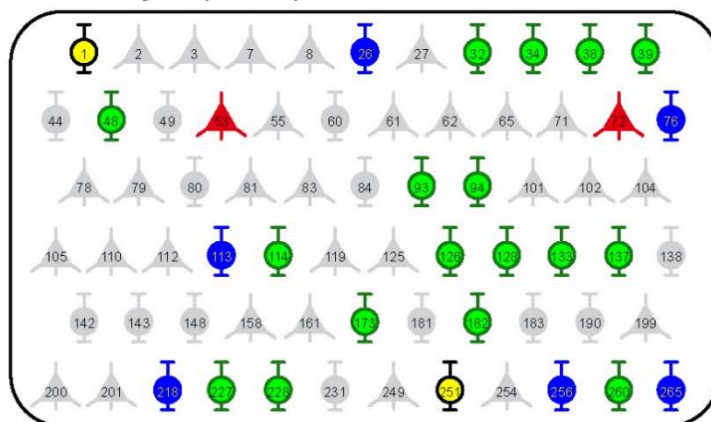

**B** Assembly-2 (Ripples)

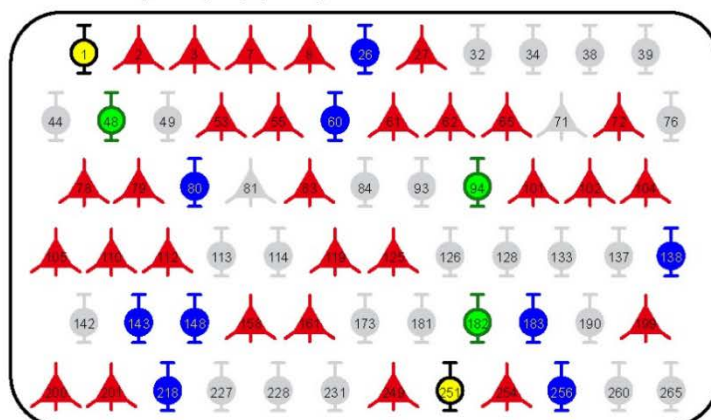

**C** Assembly-3 (DOWN-state)

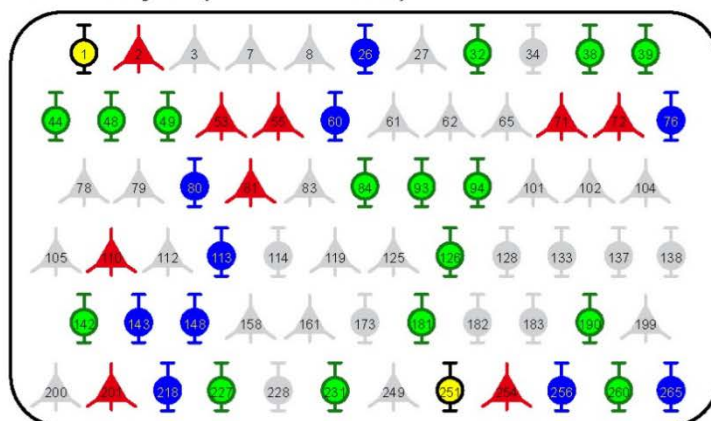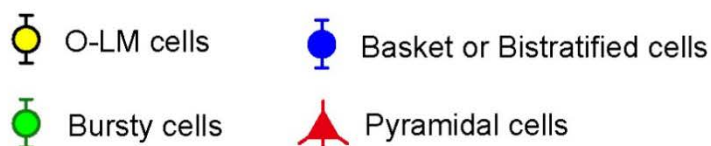

**Figure S7. Combinatorial activation patterns among three distinct cell assemblies during animal's sleep.**

(A) Illustration of identified Assembly-1 member cells engaged in sleep theta (in color: yellow for putative O-LM cells; blue for putative basket/bistratified interneurons; green for putative bursty interneurons; and red for putative pyramidal cells). Non-member cells are in gray. Numerical numbers inside each cell represent the unit simultaneously recorded.

(B) Assembly-2 corresponding to ripples.

(C) Assembly-3 corresponding to DOWN-state.

Overall, these CA1 cell assemblies employed specific-to-general combinatorial coding strategy to represent each sleep oscillation. For example, two O-LM cells (unit-1 and unit-251) were identified in all three assemblies, so were some of the pyramidal cells (unit-53 and unit-72). Some of the pyramidal cells (unit-110 and unit-201) and basket/bistratified cells (i.e. unit-60, unit-80, etc.) participated in both Assembly-2 (ripples) and Assembly-3 (DOWN-state), whereas some of the bursty cells (i.e. unit-32, unit-38, unit-39, etc.) participated in Assembly-1 and Assembly-3. Many cells exhibited assembly-specific memberships. For instance, pyramidal cells unit-101, unit-102, and unit-200 were Assembly-2 specific; bursty cells unit-173 and unit-228 were specific members of Assembly-1.

## Figure S8

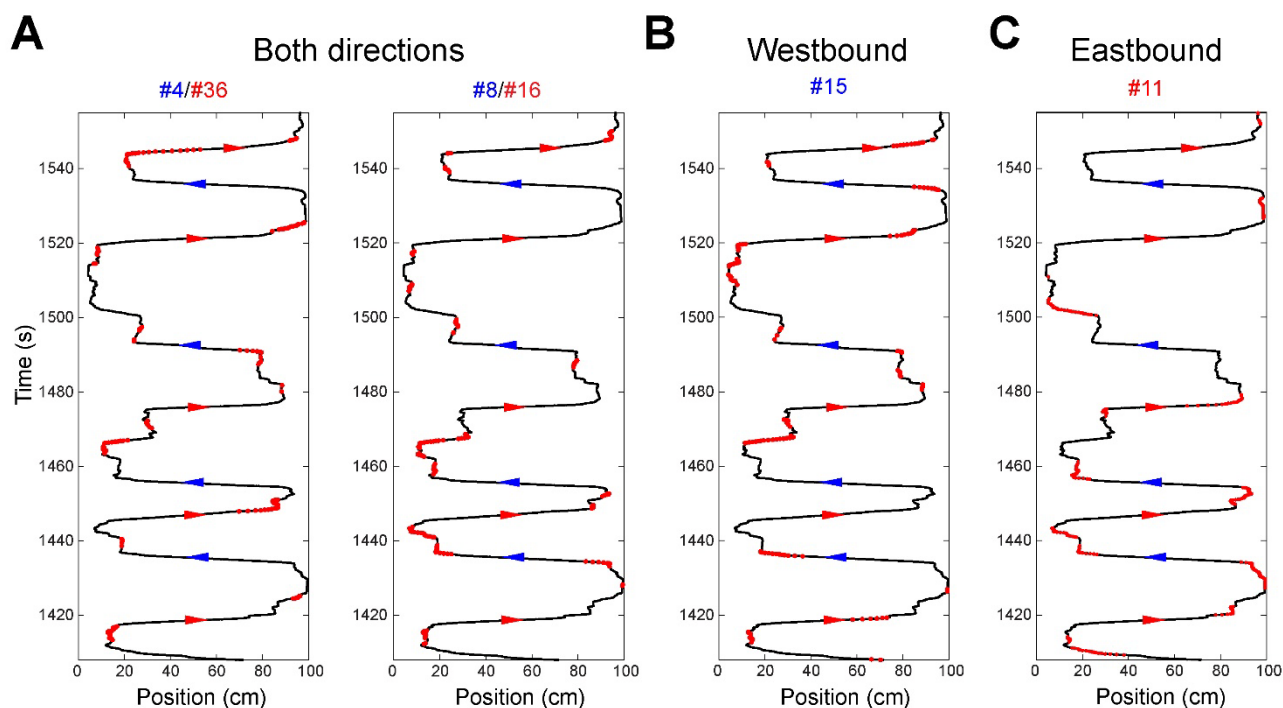

**Figure S8. Start & finish cells in navigational experiences.**

Shown are the firing-location plots of four start & finish cells decoded from linear track experiment. All these cells exhibit higher firing rate at two ends of the linear track and decreased firing when animal running in the linear track.

(A) shown are two start & finish cells participated in both cell assemblies.

(B) Firing-location plot of a start & finish cell in Assembly-1 (Westbound), this cell is not an Assembly-2 (Eastbound) member.

(C) An Assembly-2 (Eastbound) start & finish cell. Numbers above plots are their rankings among corresponding cell assemblies.

## Figure S9

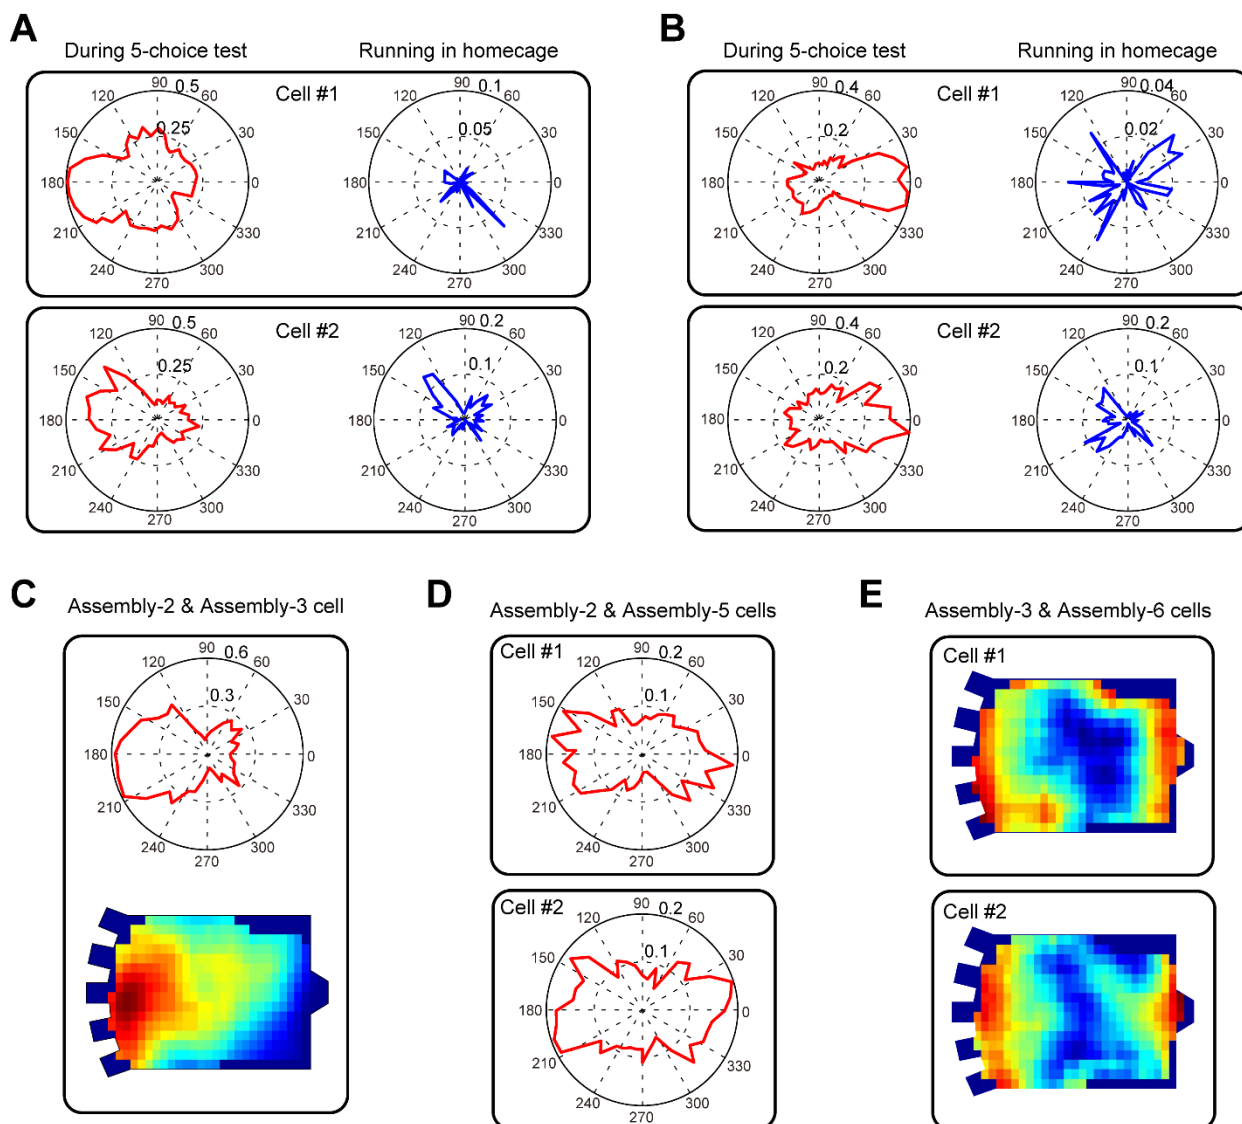



## Figure S9.

### **“Running” and “Returning” cells were task-specific as they showed no directional preferences in the home-cage.**

(A) Two representative units of “Running” cell assembly. Red curves are orientation-firing polar histograms during five-choice discrimination operant conditioning task, blue curves are orientation-firing polar histograms when animal running (speed  $\geq 2.5$ cm/s) in its home-cage.

(B) Two representative units of “Returning” cell assembly. It can be observed that units in a and b have no direction-specific firing when the animal in its home-cage environment.

### **Cells participated in multiple cell assemblies.**

(C) Orientation-firing polar histogram and location-firing map of a neuron participated in Assembly-2 (Running) and Assembly-3 (Poke zone). This neuron shows both orientation- and location- firing properties which is consistent with the definitions of ensemble patterns of “Running” and “Poke zone”.

(D) Orientation-firing polar histograms of two cells participated in Assembly-2 (Running) and Assembly-5 (Returning). These two cells show orientation-firing on both directions.

(E) Location-firing maps of two cells participated in Assembly-3 (Poke zone) and Assembly-6 (Reward zone). Location-firings of these two cells are significantly higher on both sides.

The dotted cycles and the numbers in the orientation-firing polar histograms of the cells in (A-D) denote the probabilities of neuronal spike firing in the corresponding orientation.

## Figure S10

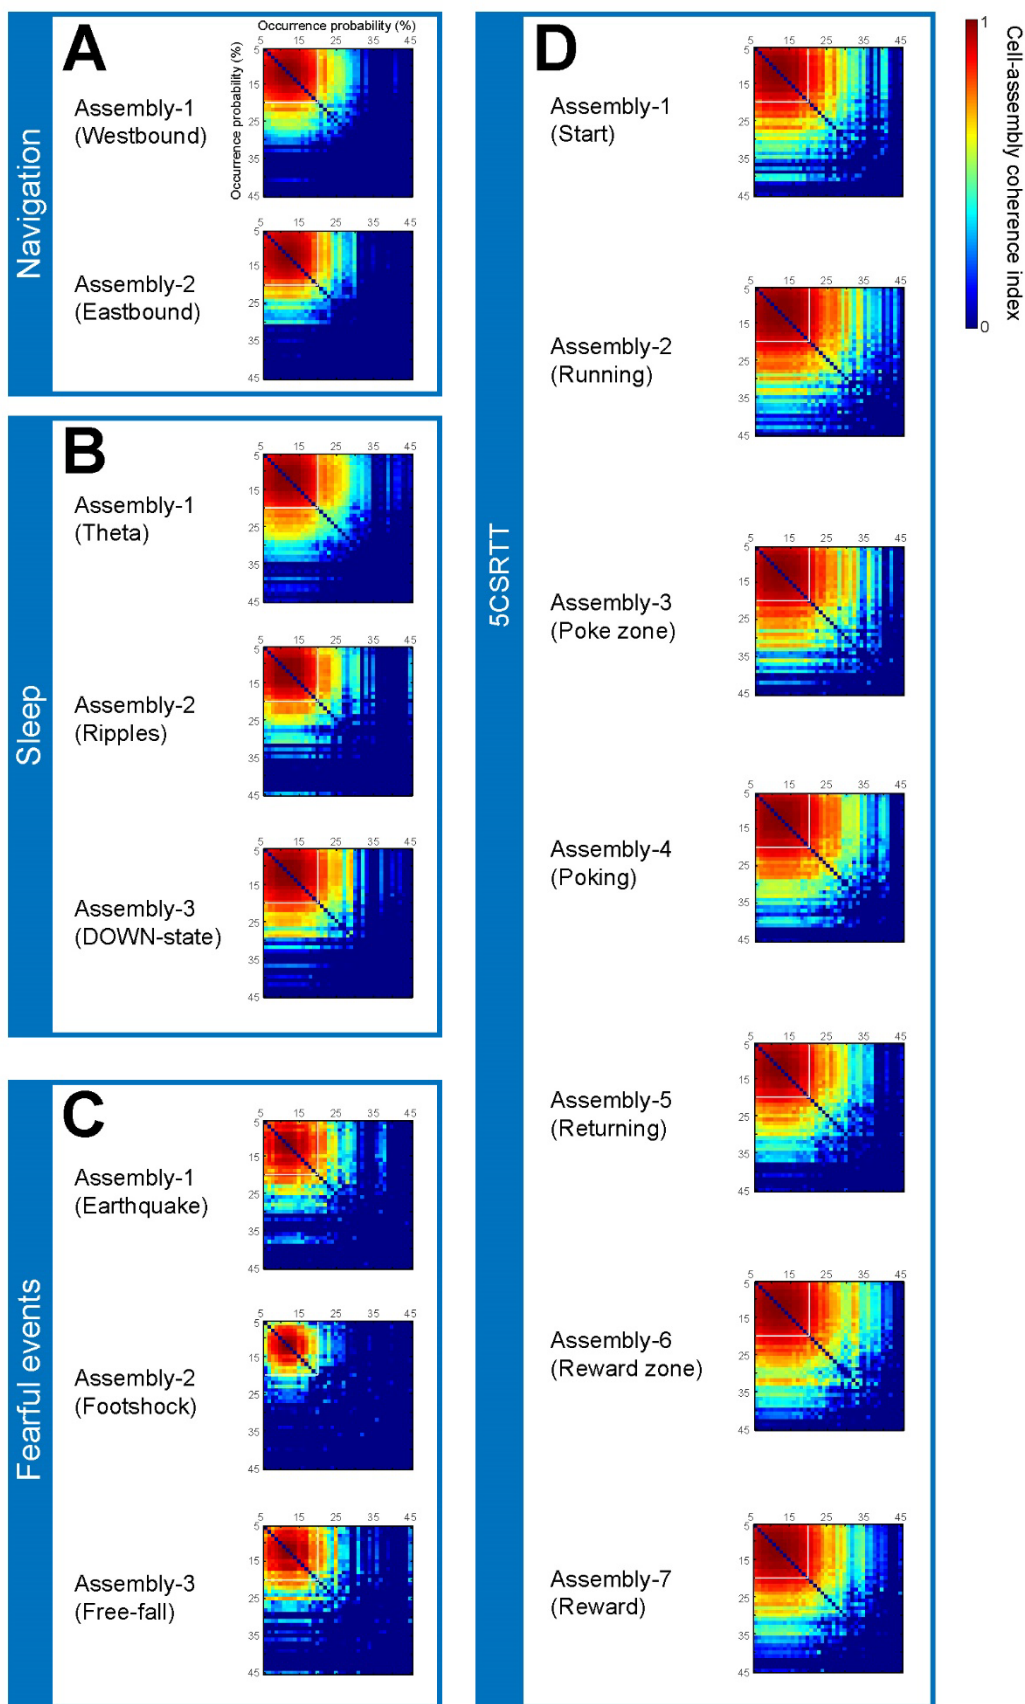

## **Figure S10. Cell assembly decoding robustness**

We systemically vary lower thresholds from 5% to 45% with step by 1% (the corresponding upper thresholds are set as one minus the value of lower point accordingly) and calculate the cell-assembly coherence indexes between the ensemble patterns corresponding to same state/stimuli. Shown are cell-assembly coherence matrixes of all 15 cell assemblies in four different experiments (A-D), it is thus evident that robust ensemble patterns can be obtained using 5%-20% ranges.

## References

1. Lin L, *et al.* (2006) Large-scale neural ensemble recording in the brains of freely behaving mice. *J Neurosci Methods* 155(1):28-38.
2. Xie K, *et al.* (2016) Brain Computation Is Organized via Power-of-Two-Based Permutation Logic. *Front Syst Neurosci* 10:95.
3. Paxinos G & Franklin KB (2004) *The mouse brain in stereotaxic coordinates* (Gulf Professional Publishing).
4. Kuang H, Lin L, & Tsien JZ (2010) Temporal dynamics of distinct CA1 cell populations during unconscious state induced by ketamine. *PLoS One* 5(12):e15209.
5. Schmitzer-Torbert N, Jackson J, Henze D, Harris K, & Redish AD (2005) Quantitative measures of cluster quality for use in extracellular recordings. *Neuroscience* 131(1):1-11.
6. Maimon G & Assad JA (2009) Beyond Poisson: increased spike-time regularity across primate parietal cortex. *Neuron* 62(3):426-440.
7. Hyvarinen A (1999) Fast and robust fixed-point algorithms for independent component analysis. *IEEE Trans Neural Netw* 10(3):626-634.
8. Liu J, Wei W, Kuang H, Tsien JZ, & Zhao F (2014) Heart rate and heart rate variability assessment identifies individual differences in fear response magnitudes to earthquake, free fall, and air puff in mice. *PLoS One* 9(3):e93270.
9. Liu J, Wei W, Kuang H, Zhao F, & Tsien JZ (2013) Changes in heart rate variability are associated with expression of short-term and long-term contextual and cued fear memories. *PLoS One* 8(5):e63590.
10. Buzsaki G, *et al.* (2003) Hippocampal network patterns of activity in the mouse. *Neuroscience* 116(1):201-211.
